# Supplementary material
Source: PubMed Central journal article supplement (PMC3938282)
Supplement: NIHMS539420-supplement-2.pdf [file NIHMS539420-supplement-2.pdf]

Supporting Information:

**Staurosporine-derived inhibitors broaden the scope of analog-sensitive kinase technology**

Michael S. Lopez<sup>1,6</sup>, Jonathan W. Choy<sup>1,6</sup>, Ulf Peters<sup>1</sup>, Martin L. Sos<sup>1</sup>, David O. Morgan<sup>2</sup> and Kevan M. Shokat<sup>1,5\*</sup>

<sup>1</sup>Howard Hughes Medical Institute and Department of Cellular & Molecular Pharmacology, University of California, San Francisco, California 94143, USA

<sup>2</sup>Department of Physiology and Department of Biochemistry and Biophysics, University of California, San Francisco, San Francisco, CA 94158, USA

<sup>5</sup>Department of Chemistry, University of California, Berkeley, California 94720, USA

<sup>6</sup>Graduate Program in Chemistry and Chemical Biology, University of California, San Francisco, California 94158, USA

## Supplemental Figures

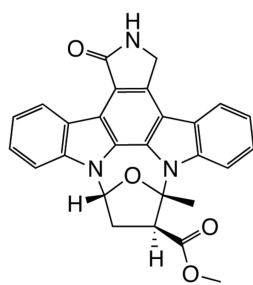

K252a

**Figure S1.** Structure of K252a

A.

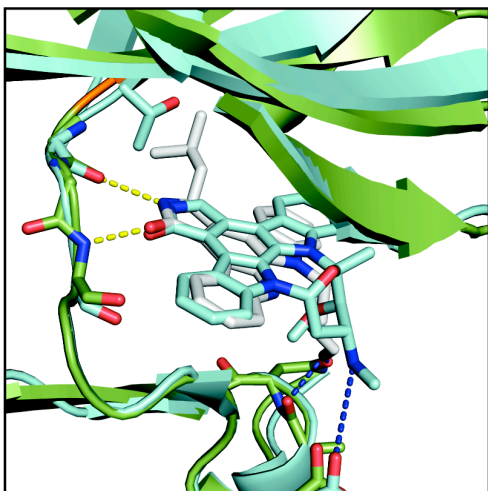

B.

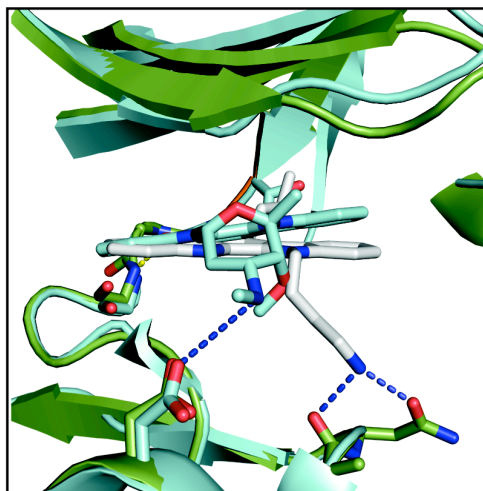

**Figure S2.** Overlay of X-ray co-crystal structures of Star 12/Src-AS1 with staurosporine/Src-WT<sup>1</sup>. A. Rings F and A of both inhibitors occupy identical positions and maintain the hinge-binding interaction between ring F and the backbone amides of residues. B. Star 12 rings C and D project below the plane of staurosporine and allow interaction of the N12 butylamine with Asn 391.

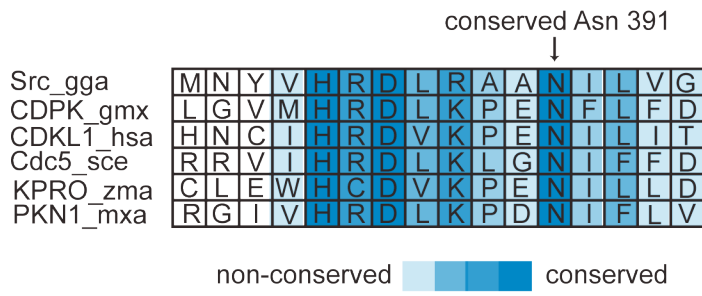

**Figure S3.** Representative sequence alignment of kinases from diverse families and organisms highlights the conservation of Asn391.

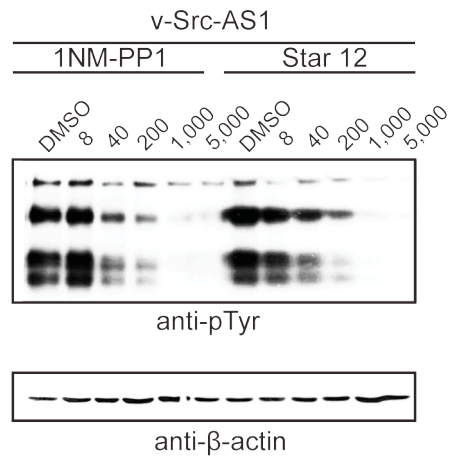

**Figure S4.** Inhibition of v-Src-AS1 by 1NM-PP1 or Star 12 in mouse 3T3 cells.

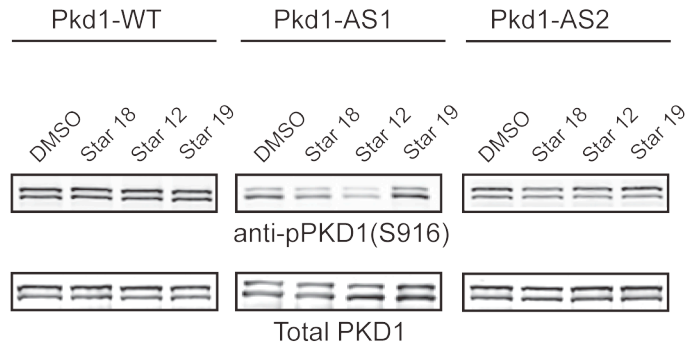

**Figure S5.** 5  $\mu$ M Star 18, Star 12, and Star 19 were tested for activity against Pkd-WT, PKD-AS1, and Pkd1-AS2 transiently transfected in 293T cells.

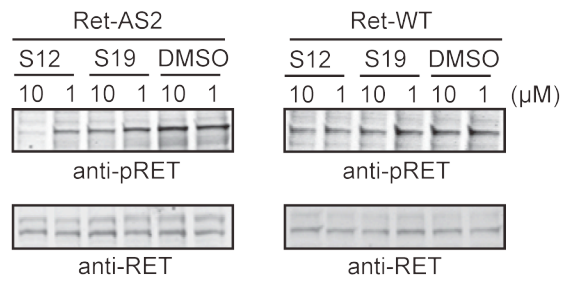

**Figure S6.** Star 12 and Star 19 were tested for inhibition of auto-phosphorylation of Ret-AS2 and Ret-WT in mouse 3T3 cells.

## Supplemental Tables

| <b>Data Collection</b>                                       |                                                                                                                                   |
|--------------------------------------------------------------|-----------------------------------------------------------------------------------------------------------------------------------|
| <b>Space Group</b>                                           | <b>P1</b>                                                                                                                         |
| <b>Unit Cell Dimensions</b>                                  | <b>a = 42.34, b = 63.34, c = 73.62, <math>\alpha</math> = 100.34,<br/><math>\beta</math> = 90.81, <math>\gamma</math> = 89.95</b> |
| <b>Number protein molecules/asymmetric unit</b>              | <b>2</b>                                                                                                                          |
| <b>X-ray Source</b>                                          | <b>A.L.S. 8.2.1</b>                                                                                                               |
| <b>Wavelength (Å)</b>                                        | <b>1.000</b>                                                                                                                      |
| <b>Resolution (Å)</b>                                        | <b>2.73</b>                                                                                                                       |
| <b>Total Reflections</b>                                     | <b>29599</b>                                                                                                                      |
| <b>Unique Reflections</b>                                    | <b>17909</b>                                                                                                                      |
| <b>I/<math>\sigma</math></b>                                 | <b>9.600</b>                                                                                                                      |
| <b>Completeness (%)</b>                                      | <b>98.7</b>                                                                                                                       |
| <b>Model Refinement</b>                                      |                                                                                                                                   |
| <b>Redolution (Å)</b>                                        | <b>43.5 – 2.73</b>                                                                                                                |
| <b>Number of Reflection Rwork/Rfree</b>                      | <b>27320/1467</b>                                                                                                                 |
| <b>Rwork/Rfree</b>                                           | <b>0.2378/0.2897</b>                                                                                                              |
| <b>Rmsd from ideality in bond length (Å)</b>                 | <b>0.005</b>                                                                                                                      |
| <b>Rmsd from ideality in Angles (°)</b>                      | <b>0.9</b>                                                                                                                        |
| <b>Number of Protein Atoms In Model</b>                      | <b>4220</b>                                                                                                                       |
| <b>Number of Drug atoms In Model</b>                         | <b>66</b>                                                                                                                         |
| <b>Favored/Allowed/Outliers in the Ramachandran Plot (%)</b> | <b>87.2/12.9/0</b>                                                                                                                |

**Table S1.** Data Collection and refinement statistics for X-ray co-crystal structure of Star 12 bound to Src-AS1 kinase domain.

## SSKB-Adapta Screen

| [ATP]<br>Tested<br>( $\mu$ M) | Kinase Tested                              | % Inhibition |            | % Inhibition<br>mean | Difference<br>Between<br>Data<br>Points<br>  Point 1 -<br>Point 2 | Test Compound<br>Interference |          | Z'   | Kinase<br>Part# / Lot# |
|-------------------------------|--------------------------------------------|--------------|------------|----------------------|-------------------------------------------------------------------|-------------------------------|----------|------|------------------------|
|                               |                                            | Point<br>1   | Point<br>2 |                      |                                                                   | Donor                         | Acceptor |      |                        |
| 100                           | CAMK1 (CaMK1)<br>CDK7/cyclin               | -20          | -7         | -14                  | 13                                                                | Pass                          | Pass     | 0.77 | PV4391/36046           |
| 100                           | H/MNAT1                                    | 0            | -3         | -2                   | 3                                                                 | Pass                          | Pass     | 0.86 | PV3868/893276          |
| 100                           | CDK9/cyclin T1<br>CHUK (IKK<br>alpha)      | -11          | -1         | -6                   | 10                                                                | Pass                          | Pass     | 0.70 | PV4131/950376          |
| 100                           | DAPK1                                      | -12          | -12        | -12                  | 0                                                                 | Pass                          | Pass     | 0.84 | PV4310/447027          |
| 100                           | GSG2 (Haspin)                              | 4            | -4         | 0                    | 8                                                                 | Pass                          | Pass     | 0.75 | PV3969/32654           |
| 100                           | IRAK1                                      | -30          | -2         | -16                  | 28                                                                | Pass                          | Pass     | 0.65 | PV5708/532062          |
| 100                           | LRRK2                                      | -12          | -6         | -9                   | 5                                                                 | Pass                          | Pass     | 0.70 | PV4403/586648          |
| 100                           | LRRK2 G2019S                               | -21          | -11        | -16                  | 10                                                                | Pass                          | Pass     | 0.78 | PV4873/768523          |
| 100                           | NUAK1 (ARK5)<br>PI4KA (PI4K<br>alpha)      | 10           | 9          | 10                   | 0                                                                 | Pass                          | Pass     | 0.85 | PV4881/742572          |
| 100                           | PI4KB (PI4K<br>beta)                       | -8           | 12         | 2                    | 20                                                                | Pass                          | Pass     | 0.71 | PV4127/36741           |
| 10                            | PIK3C2A (PI3K-<br>C2 alpha)                | -15          | -14        | -14                  | 1                                                                 | Pass                          | Pass     | 0.85 | PV5689/1033749         |
| 100                           | PIK3C2B (PI3K-<br>C2 beta)                 | -12          | -20        | -16                  | 8                                                                 | Pass                          | Pass     | 0.65 | PV5277/493329          |
| 100                           | PIK3C3<br>(hVPS34)                         | -5           | 0          | -2                   | 4                                                                 | Pass                          | Pass     | 0.80 | PV5586/514135          |
| 100                           | PIK3CA/PIK3R1<br>(p110 alpha/p85<br>alpha) | -9           | 20         | 6                    | 29                                                                | Pass                          | Pass     | 0.71 | PV5374/927501          |
| 100                           | PIK3CD/PIK3R1<br>(p110 delta/p85<br>alpha) | -16          | -7         | -11                  | 9                                                                 | Pass                          | Pass     | 0.79 | PV5126/461254          |
| 100                           | PIK3CG (p110<br>gamma)                     | 1            | 0          | 0                    | 1                                                                 | Pass                          | Pass     | 0.84 | PV4788/616250          |
| 100                           | SPHK1                                      | -12          | -7         | -9                   | 5                                                                 | Pass                          | Pass     | 0.65 | PV5273/722462          |
| 100                           | SPHK2                                      | -9           | -21        | -15                  | 12                                                                | Pass                          | Pass     | 0.66 | PV4786/663536          |
| 100                           |                                            | 6            | 17         | 12                   | 11                                                                | Pass                          | Pass     | 0.78 | PV5214/417324          |
| 100                           |                                            | -14          | 7          | -4                   | 21                                                                | Pass                          | Pass     | 0.54 | PV5216/884914          |

## SSBK-LanthaScreen Binding Assay

| Kinase Tested             | % Displacement |         | % Displacement | Difference Between Data Points | Test Compound Interference |          | Z'   | Kinase Part# / Lot# |
|---------------------------|----------------|---------|----------------|--------------------------------|----------------------------|----------|------|---------------------|
|                           | Point 1        | Point 2 | mean           | Point 1 - Point 2              | Donor                      | Acceptor |      |                     |
| ACVR2B                    | 6              | 18      | 12             | 12                             | Pass                       | Pass     | 0.76 | PV6049/745099       |
| BMPR1A (ALK3)             | 13             | -4      | 4              | 17                             | Pass                       | Pass     | 0.65 | PV6038/670004       |
| CAMKK1 (CAMKKA)           | 14             | -3      | 5              | 17                             | Pass                       | Pass     | 0.76 | PV4670/406782       |
| CAMKK2 (CaMKK beta)       | 22             | 17      | 20             | 5                              | Pass                       | Pass     | 0.85 | PV4206/35319        |
| CDK8/cyclin C             | 9              | 9       | 9              | 0                              | Pass                       | Pass     | 0.84 | PV4402/36848        |
| CDK9/cyclin K             | 17             | 9       | 13             | 8                              | Pass                       | Pass     | 0.74 | PV4335/35774        |
| CLK4                      | 19             | 23      | 21             | 4                              | Pass                       | Pass     | 0.73 | PV3839/827665       |
| DDR1                      | -1             | 5       | 2              | 6                              | Pass                       | Pass     | 0.78 | PV6047/693053       |
| DDR2                      | 0              | -5      | -2             | 5                              | Pass                       | Pass     | 0.77 | PV3870/916220       |
| DMPK                      | 13             | 12      | 13             | 1                              | Pass                       | Pass     | 0.89 | PV3784/34024        |
| EPHA3                     | 19             | 9       | 14             | 10                             | Pass                       | Pass     | 0.71 | PV3359/30916        |
| EPHA7                     | 12             | 6       | 9              | 5                              | Pass                       | Pass     | 0.69 | PV3689/33790        |
| KIT V654A                 | 8              | 3       | 6              | 5                              | Pass                       | Pass     | 0.64 | PV4132/35129        |
| LIMK1                     | 5              | 6       | 6              | 1                              | Pass                       | Pass     | 0.70 | PV4337/367810       |
| LIMK2                     | 15             | 8       | 11             | 7                              | Pass                       | Pass     | 0.87 | PV3860/36861        |
| MAP2K1 (MEK1) S218D S222D | -1             | 11      | 5              | 12                             | Pass                       | Pass     | 0.80 | P3099/38541         |
| MAP2K3 (MEK3)             | -15            | -7      | -11            | 8                              | Pass                       | Pass     | 0.66 | PV3662/357368       |
| MAP2K6 (MKK6) S207E T211E | 7              | 6       | 6              | 1                              | Pass                       | Pass     | 0.84 | PV3293/42371        |
| MAP3K10 (MLK2)            | 10             | 5       | 8              | 5                              | Pass                       | Pass     | 0.87 | PV3877/34554        |
| MAP3K11 (MLK3)            | 9              | 10      | 10             | 2                              | Pass                       | Pass     | 0.88 | PV3788/625672       |
| MAP3K14 (NIK)             | 4              | 6       | 5              | 2                              | Pass                       | Pass     | 0.73 | PV4902/840992       |
| MAP3K2 (MEKK2)            | 10             | 11      | 10             | 1                              | Pass                       | Pass     | 0.66 | PV3822/34361        |

|                                 |    |    |    |    |      |      |      |               |
|---------------------------------|----|----|----|----|------|------|------|---------------|
| MAP3K3 (MEKK3)                  | 17 | -6 | 5  | 23 | Pass | Pass | 0.64 | PV3876/702480 |
| MAP3K5 (ASK1)                   | 7  | 17 | 12 | 10 | Pass | Pass | 0.66 | PV3809/666419 |
| MAP3K7/MAP3K7IP1<br>(TAK1-TAB1) | 15 | 3  | 9  | 12 | Pass | Pass | 0.80 | PV4394/452618 |
| MKNK2 (MNK2)                    | 5  | 8  | 6  | 3  | Pass | Pass | 0.69 | PV5607/811381 |
| MLCK (MLCK2)                    | 19 | 11 | 15 | 8  | Pass | Pass | 0.78 | PV3835/34028  |
| MYLK (MLCK)                     | 20 | 21 | 21 | 0  | Pass | Pass | 0.86 | PV4339/36152  |
| NLK                             | 16 | 3  | 9  | 13 | Pass | Pass | 0.75 | PV4309/35323  |
| RIPK2                           | 7  | 0  | 4  | 7  | Pass | Pass | 0.92 | PV4213/35334  |
| SLK                             | 7  | 5  | 6  | 3  | Pass | Pass | 0.84 | PV3830/34390  |
| STK16 (PKL12)                   | 9  | 13 | 11 | 4  | Pass | Pass | 0.62 | PV4311/36847  |
| STK17A (DRAK1)                  | 16 | 17 | 16 | 1  | Pass | Pass | 0.83 | PV3783/33789  |
| STK33                           | 14 | 7  | 10 | 7  | Pass | Pass | 0.86 | PV4343/708765 |
| TAOK3 (JIK)                     | 7  | 10 | 8  | 3  | Pass | Pass | 0.59 | PV3652/32935  |
| TEC                             | 6  | 3  | 4  | 4  | Pass | Pass | 0.79 | PV3269/29194  |
| TGFBR1 (ALK5)                   | 4  | 2  | 3  | 2  | Pass | Pass | 0.83 | PV5837/562479 |
| TNK2 (ACK)                      | 10 | 10 | 10 | 0  | Pass | Pass | 0.89 | PV4807/407338 |
| TTK                             | 6  | -2 | 2  | 7  | Pass | Pass | 0.78 | PV3792/759947 |
| WEE1                            | 11 | 3  | 7  | 8  | Pass | Pass | 0.58 | PV3817/722460 |
| WNK2                            | 9  | 2  | 6  | 8  | Pass | Pass | 0.71 | PV4341/35976  |
| ZAK                             | 3  | 1  | 2  | 2  | Pass | Pass | 0.87 | PV3882/34603  |



## SSKB-Z'-Lyte Screen

| [ATP]<br>Tested<br><br>( $\mu$ M) | Kinase<br>Tested    | % Inhibition |            | %<br>Inhibition | Difference<br>Between<br>Data<br>Points | Development<br>Reaction<br>Interference | Test Compound<br>Interference |             | Z'   | Kinase<br>Part# / Lot# |
|-----------------------------------|---------------------|--------------|------------|-----------------|-----------------------------------------|-----------------------------------------|-------------------------------|-------------|------|------------------------|
|                                   |                     | Point<br>1   | Point<br>2 | mean            | Point 1 -<br>Point 2                    |                                         | Coumarin                      | Fluorescein |      |                        |
| 100                               | ABL1<br>E255K       | -2           | 6          | 2               | 8                                       | Pass                                    | Pass                          | Pass        | 0.89 | PV3864/34528           |
| 100                               | ABL1<br>G250E       | -1           | -4         | -2              | 3                                       | Pass                                    | Pass                          | Pass        | 0.94 | PV3865/34529           |
| 100                               | ABL1 T315I          | 1            | 0          | 1               | 1                                       | Pass                                    | Pass                          | Pass        | 0.87 | PV3866/39639           |
| 100                               | ABL1<br>Y253F       | -4           | -2         | -3              | 2                                       | Pass                                    | Pass                          | Pass        | 0.91 | PV3863/34531           |
| 100                               | ABL2 (Arg)          | -5           | 0          | -3              | 5                                       | Pass                                    | Pass                          | Pass        | 0.90 | PV3266/29170           |
| 100                               | ACVR1B<br>(ALK4)    | -11          | -14        | -13             | 3                                       | Pass                                    | Pass                          | Pass        | 0.88 | PV4312/794484          |
| 100                               | ADRBK1<br>(GRK2)    | 0            | 14         | 7               | 13                                      | Pass                                    | Pass                          | Pass        | 0.63 | PV3361/883372          |
| 100                               | ADRBK2<br>(GRK3)    | 16           | 2          | 9               | 14                                      | Pass                                    | Pass                          | Pass        | 0.81 | PV3827/38897           |
| 100                               | AKT1 (PKB<br>alpha) | 13           | 17         | 15              | 4                                       | Pass                                    | Pass                          | Pass        | 0.85 | P2999/685567           |
| 100                               | AKT2 (PKB<br>beta)  | 14           | 17         | 16              | 3                                       | Pass                                    | Pass                          | Pass        | 0.69 | PV3184/28770           |
| 100                               | AKT3 (PKB<br>gamma) | 6            | 17         | 11              | 11                                      | Pass                                    | Pass                          | Pass        | 0.68 | PV3185/28771           |
| 100                               | AMPK<br>A1/B1/G1    | 8            | 11         | 10              | 3                                       | Pass                                    | Pass                          | Pass        | 0.71 | PV4672/38499           |
| 100                               | AMPK<br>A2/B1/G1    | 16           | 11         | 13              | 6                                       | Pass                                    | Pass                          | Pass        | 0.82 | PV4674/568101          |
| 100                               | AURKA<br>(Aurora A) | -1           | 18         | 8               | 19                                      | Pass                                    | Pass                          | Pass        | 0.71 | PV3612/32155           |
| 100                               | AURKB<br>(Aurora B) | 7            | 9          | 8               | 2                                       | Pass                                    | Pass                          | Pass        | 0.74 | PV6130/857013          |
| 100                               | AURKC<br>(Aurora C) | 7            | 8          | 7               | 1                                       | Pass                                    | Pass                          | Pass        | 0.70 | PV3856/824479          |

|     |                             |     |     |     |    |      |      |      |      |                |
|-----|-----------------------------|-----|-----|-----|----|------|------|------|------|----------------|
| 100 | AXL                         | 35  | 35  | 35  | 1  | Pass | Pass | Pass | 0.84 | PV3971/748353  |
| 100 | BLK                         | 1   | 7   | 4   | 7  | Pass | Pass | Pass | 0.86 | PV3683/33635   |
| 100 | BMX                         | -3  | 0   | -2  | 3  | Pass | Pass | Pass | 0.92 | PV3371/953336  |
| 100 | BRAF                        | -20 | 3   | -8  | 23 | Pass | Pass | Pass | 0.76 | PV3848/34486   |
| 100 | BRAF<br>V599E               | -14 | -7  | -10 | 7  | Pass | Pass | Pass | 0.83 | PV3849/910409  |
| 100 | BRSK1<br>(SAD1)             | -9  | 3   | -3  | 12 | Pass | Pass | Pass | 0.93 | PV4333/36097   |
| 100 | BTK                         | -3  | -6  | -5  | 3  | Pass | Pass | Pass | 0.81 | PV3363/619547  |
| 100 | CAMK1D<br>(CaMKI<br>delta)  | -1  | 0   | -1  | 1  | Pass | Pass | Pass | 0.61 | PV3663/1042984 |
| 100 | CAMK2A<br>(CaMKII<br>alpha) | 1   | 8   | 5   | 7  | Pass | Pass | Pass | 0.85 | PV3142/28192   |
| 100 | CAMK2B<br>(CaMKII<br>beta)  | 7   | 21  | 14  | 14 | Pass | Pass | Pass | 0.64 | PV4205/35330   |
| 100 | CAMK2D<br>(CaMKII<br>delta) | 28  | 19  | 24  | 9  | Pass | Pass | Pass | 0.90 | PV3373/31647   |
| 100 | CAMK4<br>(CaMKIV)           | -3  | -18 | -10 | 15 | Pass | Pass | Pass | 0.62 | PV3310/980091  |
| 100 | CDC42<br>BPA<br>(MRCKA)     | 6   | 11  | 9   | 5  | Pass | Pass | Pass | 0.78 | PV4398/36844   |
| 100 | CDC42<br>BPB<br>(MRCKB)     | 0   | 22  | 11  | 22 | Pass | Pass | Pass | 0.53 | PV4399/36845   |
| 100 | CDK1/cyclin<br>B            | -2  | 5   | 2   | 7  | Pass | Pass | Pass | 0.94 | PV3292/873341  |
| 100 | CDK2/cyclin<br>A            | 9   | 1   | 5   | 8  | Pass | Pass | Pass | 0.75 | PV3267/884904  |
| 100 | CDK5/p25                    | -3  | -3  | -3  | 0  | Pass | Pass | Pass | 0.77 | PV4676/474298  |
| 100 | CDK5/p35                    | -1  | 4   | 2   | 5  | Pass | Pass | Pass | 0.86 | PV3000/25348   |
| 100 | CHEK1<br>(CHK1)             | 12  | 10  | 11  | 2  | Pass | Pass | Pass | 0.76 | P3040/28702    |
| 100 | CHEK2                       | 6   | 7   | 7   | 1  | Pass | Pass | Pass | 0.87 | PV3367/794466  |

| (CHK2) |                             |     |    |     |    |      |      |      |      |                |
|--------|-----------------------------|-----|----|-----|----|------|------|------|------|----------------|
| 100    | CLK1                        | 3   | 7  | 5   | 4  | Pass | Pass | Pass | 0.88 | PV3315/943590  |
| 100    | CLK2                        | 2   | 5  | 3   | 3  | Pass | Pass | Pass | 0.84 | PV4201/271879  |
| 100    | CLK3                        | 4   | 4  | 4   | 0  | Pass | Pass | Pass | 0.90 | PV3826/939820  |
| 100    | CSF1R<br>(FMS)              | 3   | 6  | 4   | 3  | Pass | Pass | Pass | 0.87 | PV3249/66239   |
| 100    | CSK                         | -15 | -3 | -9  | 12 | Pass | Pass | Pass | 0.83 | P2927/933640   |
| 100    | CSNK1A1<br>(CK1 alpha<br>1) | -13 | 0  | -7  | 13 | Pass | Pass | Pass | 0.91 | PV3850/784631  |
| 100    | CSNK1D<br>(CK1 delta)       | -2  | 2  | 0   | 4  | Pass | Pass | Pass | 0.95 | PV3665/843704  |
| 100    | CSNK1E<br>(CK1<br>epsilon)  | -4  | -3 | -4  | 1  | Pass | Pass | Pass | 0.78 | PV3500/807880  |
| 100    | CSNK1G1<br>(CK1<br>gamma 1) | -7  | 8  | 0   | 15 | Pass | Pass | Pass | 0.91 | PV3825/34360   |
| 100    | CSNK1G2<br>(CK1<br>gamma 2) | 2   | 6  | 4   | 4  | Pass | Pass | Pass | 0.96 | PV3499/31770   |
| 100    | CSNK1G3<br>(CK1<br>gamma 3) | -2  | 1  | -1  | 3  | Pass | Pass | Pass | 0.94 | PV3838/34380   |
| 100    | CSNK2A1<br>(CK2 alpha<br>1) | -7  | -3 | -5  | 4  | Pass | Pass | Pass | 0.87 | PV3248/29242   |
| 100    | CSNK2A2<br>(CK2 alpha<br>2) | 6   | 5  | 5   | 1  | Pass | Pass | Pass | 0.89 | PV3624/32653   |
| 100    | DAPK3<br>(ZIPK)             | 15  | 4  | 9   | 11 | Pass | Pass | Pass | 0.62 | PV3686/827666  |
| 100    | DCAMKL2<br>(DCK2)           | -2  | 8  | 3   | 10 | Pass | Pass | Pass | 0.81 | PV4297/869931  |
| 100    | DNA-PK                      | -6  | 5  | 0   | 11 | Pass | Pass | Pass | 0.82 | PV5864/628328  |
| 100    | DYRK1A                      | 6   | 5  | 6   | 1  | Pass | Pass | Pass | 0.86 | PV3785/683159  |
| 100    | DYRK1B                      | -1  | 4  | 2   | 5  | Pass | Pass | Pass | 0.69 | PV4649/7141040 |
| 100    | DYRK3                       | -13 | -9 | -11 | 4  | Pass | Pass | Pass | 0.89 | PV3837/290370  |

|     |                                   |     |     |     |    |      |      |      |      |                |
|-----|-----------------------------------|-----|-----|-----|----|------|------|------|------|----------------|
| 100 | DYRK4                             | 2   | 8   | 5   | 6  | Pass | Pass | Pass | 0.93 | PV3871/37361   |
| 100 | EEF2K                             | 0   | 0   | 0   | 1  | Pass | Pass | Pass | 0.93 | PV4559/1048267 |
| 100 | EGFR<br>(ErbB1)                   | -7  | -2  | -5  | 5  | Pass | Pass | Pass | 0.61 | PV3872/742577  |
| 100 | EGFR<br>(ErbB1)<br>L858R          | -15 | -15 | -15 | 0  | Pass | Pass | Pass | 0.73 | PV4128/279551  |
| 100 | EGFR<br>(ErbB1)<br>L861Q          | -5  | 2   | -1  | 7  | Pass | Pass | Pass | 0.67 | PV3873/34562   |
| 100 | EGFR<br>(ErbB1)<br>T790M          | 5   | 9   | 7   | 4  | Pass | Pass | Pass | 0.58 | PV4803/552604  |
| 100 | EGFR<br>(ErbB1)<br>T790M<br>L858R | 9   | 6   | 7   | 3  | Pass | Pass | Pass | 0.89 | PV4879/350247  |
| 100 | EPHA1                             | 0   | 1   | 0   | 2  | Pass | Pass | Pass | 0.89 | PV3841/629216  |
| 100 | EPHA2                             | -5  | 0   | -2  | 5  | Pass | Pass | Pass | 0.95 | PV3688/36904   |
| 100 | EPHA4                             | -3  | -1  | -2  | 2  | Pass | Pass | Pass | 0.88 | PV3651/32933   |
| 100 | EPHA5                             | 0   | 0   | 0   | 1  | Pass | Pass | Pass | 0.90 | PV3840/34383   |
| 100 | EPHA8                             | -8  | -5  | -6  | 4  | Pass | Pass | Pass | 0.94 | PV3844/36870   |
| 100 | EPHB1                             | -5  | -4  | -4  | 1  | Pass | Pass | Pass | 0.91 | PV3786/34225   |
| 100 | EPHB2                             | -2  | -3  | -2  | 2  | Pass | Pass | Pass | 0.92 | PV3625/32656   |
| 100 | EPHB3                             | 1   | -1  | 0   | 2  | Pass | Pass | Pass | 0.92 | PV3658/33066   |
| 100 | EPHB4                             | -7  | -1  | -4  | 7  | Pass | Pass | Pass | 0.95 | PV3251/29241   |
| 100 | ERBB2<br>(HER2)                   | -1  | -8  | -5  | 7  | Pass | Pass | Pass | 0.79 | PV3366/1007110 |
| 100 | ERBB4<br>(HER4)                   | -8  | 4   | -2  | 12 | Pass | Pass | Pass | 0.87 | PV3626/32657   |
| 100 | FER                               | -1  | 2   | 0   | 3  | Pass | Pass | Pass | 0.72 | PV3806/38496   |
| 100 | FES (FPS)                         | -1  | 13  | 6   | 14 | Pass | Pass | Pass | 0.86 | PV3354/35734   |
| 100 | FGFR1                             | 1   | 8   | 5   | 8  | Pass | Pass | Pass | 0.70 | PV3146/28427   |
| 100 | FGFR2                             | -17 | -23 | -20 | 6  | Pass | Pass | Pass | 0.58 | PV3368/31517   |
| 100 | FGFR3                             | -9  | 12  | 1   | 21 | Pass | Pass | Pass | 0.69 | PV3145/28459   |

|     |                          |     |    |    |    |      |      |      |      |                |
|-----|--------------------------|-----|----|----|----|------|------|------|------|----------------|
| 100 | FGFR3<br>K650E           | 3   | 7  | 5  | 4  | Pass | Pass | Pass | 0.84 | PV4392/36445   |
| 100 | FGFR4                    | 0   | 3  | 1  | 2  | Pass | Pass | Pass | 0.65 | P3054/26967    |
| 100 | FGR                      | -1  | 1  | 0  | 2  | Pass | Pass | Pass | 0.91 | P3041/26670    |
| 100 | FLT1<br>(VEGFR1)         | -16 | 2  | -7 | 18 | Pass | Pass | Pass | 0.64 | PV3666/33924   |
| 100 | FLT3                     | 39  | 44 | 41 | 5  | Pass | Pass | Pass | 0.90 | PV3182/1012909 |
| 100 | FLT3<br>D835Y            | 48  | 61 | 55 | 13 | Pass | Pass | Pass | 0.74 | PV3967/308809  |
| 100 | FLT4<br>(VEGFR3)         | -5  | -3 | -4 | 2  | Pass | Pass | Pass | 0.81 | PV4129/38454   |
| 100 | FRAP1<br>(mTOR)          | -10 | -3 | -6 | 8  | Pass | Pass | Pass | 0.84 | PV4753/873345  |
| 100 | FRK (PTK5)               | -5  | 0  | -3 | 5  | Pass | Pass | Pass | 0.87 | PV3874/34553   |
| 100 | FYN                      | -3  | 6  | 1  | 9  | Pass | Pass | Pass | 0.85 | P3042/1046027  |
| 100 | GRK4                     | 10  | 7  | 8  | 3  | Pass | Pass | Pass | 0.72 | PV3807/618977  |
| 100 | GRK5                     | -3  | 6  | 2  | 9  | Pass | Pass | Pass | 0.90 | PV3824/879275  |
| 100 | GRK6                     | -1  | 9  | 4  | 11 | Pass | Pass | Pass | 0.81 | PV3661/37437   |
| 100 | GRK7                     | -3  | 0  | -2 | 3  | Pass | Pass | Pass | 0.83 | PV3823/34013   |
| 100 | GSK3A<br>(GSK3<br>alpha) | -4  | -1 | -2 | 3  | Pass | Pass | Pass | 0.81 | PV6126/862449  |
| 100 | GSK3B<br>(GSK3<br>beta)  | 14  | 15 | 14 | 2  | Pass | Pass | Pass | 0.90 | PV3365/371501  |
| 100 | HCK                      | -6  | 5  | 0  | 11 | Pass | Pass | Pass | 0.85 | PV6128/862448  |
| 100 | HIPK1<br>(Myak)          | -2  | -2 | -2 | 0  | Pass | Pass | Pass | 0.81 | PV4561/725394  |
| 100 | HIPK2                    | -4  | 3  | 0  | 6  | Pass | Pass | Pass | 0.95 | PV5275/452552  |
| 100 | HIPK3<br>(YAK1)          | -6  | 5  | -1 | 11 | Pass | Pass | Pass | 0.87 | PV4209/35332   |
| 100 | HIPK4                    | -2  | 3  | 1  | 6  | Pass | Pass | Pass | 0.75 | PV3852/719847  |
| 100 | IGF1R                    | -7  | -2 | -5 | 5  | Pass | Pass | Pass | 0.91 | PV3250/924345  |
| 100 | IKBKB (IKK<br>beta)      | 3   | 4  | 3  | 1  | Pass | Pass | Pass | 0.93 | PV3836/38273   |

|     |                     |    |    |    |    |      |      |      |      |                |
|-----|---------------------|----|----|----|----|------|------|------|------|----------------|
| 100 | IKBKE (IKK epsilon) | 6  | 3  | 5  | 2  | Pass | Pass | Pass | 0.80 | PV4875/853377  |
| 100 | INSR                | 0  | 3  | 1  | 4  | Pass | Pass | Pass | 0.89 | PV3781/34033   |
| 100 | INSRR (IRR)         | 8  | 9  | 8  | 1  | Pass | Pass | Pass | 0.86 | PV3808/34272   |
| 100 | IRAK4               | 9  | 23 | 16 | 13 | Pass | Pass | Pass | 0.70 | PV3362/788123  |
| 100 | ITK                 | -4 | -3 | -4 | 1  | Pass | Pass | Pass | 0.88 | PV3875/919688  |
| 100 | JAK1                | -5 | -2 | -4 | 3  | Pass | Pass | Pass | 0.95 | PV4774/877058  |
| 100 | JAK2                | -2 | -3 | -3 | 2  | Pass | Pass | Pass | 0.87 | PV4210/565233  |
| 100 | JAK2 JH1 JH2        | 12 | 11 | 11 | 1  | Pass | Pass | Pass | 0.72 | PV4393/311662  |
| 100 | JAK2 JH1 JH2 V617F  | 2  | -1 | 0  | 3  | Pass | Pass | Pass | 0.81 | PV4336/463344  |
| 100 | JAK3                | 6  | 1  | 4  | 6  | Pass | Pass | Pass | 0.89 | PV3855/1017963 |
| 100 | KDR (VEGFR2)        | -6 | -4 | -5 | 2  | Pass | Pass | Pass | 0.89 | PV3660/36431   |
| 100 | KIT                 | 4  | 2  | 3  | 1  | Pass | Pass | Pass | 0.82 | P3081/401941   |
| 100 | KIT T670I           | 1  | 3  | 2  | 2  | Pass | Pass | Pass | 0.83 | PV3869/34504   |
| 100 | LCK                 | -3 | -1 | -2 | 2  | Pass | Pass | Pass | 0.91 | P3043/850070   |
| 100 | LTK (TYK1)          | -1 | -3 | -2 | 2  | Pass | Pass | Pass | 0.92 | PV4651/538791  |
| 100 | LYN A               | 0  | 0  | 0  | 0  | Pass | Pass | Pass | 0.89 | P2906/469157   |
| 100 | LYN B               | -2 | 0  | -1 | 2  | Pass | Pass | Pass | 0.88 | P2907/21076    |
| 100 | MAP2K1 (MEK1)       | 12 | 21 | 17 | 9  | Pass | Pass | Pass | 0.81 | PV3303/814863  |
| 100 | MAP2K2 (MEK2)       | 6  | 13 | 10 | 7  | Pass | Pass | Pass | 0.78 | PV3615/32519   |
| 100 | MAP2K6 (MKK6)       | -4 | 4  | 0  | 7  | Pass | Pass | Pass | 0.69 | PV3318/884909  |
| 100 | MAP3K8 (COT)        | 13 | 13 | 13 | 1  | Pass | Pass | Pass | 0.81 | PV4313/1033753 |
| 100 | MAP3K9 (MLK1)       | 24 | 31 | 27 | 6  | Pass | Pass | Pass | 0.81 | PV3787/762486  |
| 100 | MAP4K2 (GCK)        | 18 | 6  | 12 | 12 | Pass | Pass | Pass | 0.75 | PV4211/685403  |
| 100 | MAP4K4              | 2  | 2  | 2  | 1  | Pass | Pass | Pass | 0.86 | PV3687/792773  |

|     |                                 |    |    |    |    |      |      |      |      |               |  |
|-----|---------------------------------|----|----|----|----|------|------|------|------|---------------|--|
|     | (HGK)                           |    |    |    |    |      |      |      |      |               |  |
| 100 | MAP4K5<br>(KHS1)                | -6 | 3  | -2 | 9  | Pass | Pass | Pass | 0.77 | PV3682/33456  |  |
| 100 | MAPK1<br>(ERK2)                 | 8  | 13 | 10 | 5  | Pass | Pass | Pass | 0.91 | PV3313/648841 |  |
| 100 | MAPK10<br>(JNK3)                | 18 | 30 | 24 | 13 | Pass | Pass | Pass | 0.84 | PV4563/939823 |  |
| 100 | MAPK11<br>(p38 beta)            | -1 | 0  | 0  | 1  | Pass | Pass | Pass | 0.79 | PV3679/36343  |  |
| 100 | MAPK12<br>(p38<br>gamma)        | -2 | 0  | -1 | 2  | Pass | Pass | Pass | 0.74 | PV3654/904349 |  |
| 100 | MAPK13<br>(p38 delta)           | 5  | 7  | 6  | 2  | Pass | Pass | Pass | 0.58 | PV3656/36817  |  |
| 100 | MAPK14<br>(p38 alpha)           | -8 | -2 | -5 | 6  | Pass | Pass | Pass | 0.90 | PV3304/37819  |  |
| 100 | MAPK14<br>(p38 alpha)<br>Direct | -5 | -6 | -5 | 0  | Pass | Pass | Pass | 0.91 | PV3304/37819  |  |
| 100 | MAPK3<br>(ERK1)                 | 8  | 14 | 11 | 6  | Pass | Pass | Pass | 0.78 | PV3311/35296  |  |
| 100 | MAPK8<br>(JNK1)                 | 0  | 5  | 2  | 4  | Pass | Pass | Pass | 0.77 | PV3319/762483 |  |
| 100 | MAPK9<br>(JNK2)                 | 3  | 5  | 4  | 2  | Pass | Pass | Pass | 0.89 | PV3620/32388  |  |
| 100 | MAPKAPK2                        | 5  | -1 | 2  | 6  | Pass | Pass | Pass | 0.63 | PV3317/36559  |  |
| 100 | MAPKAPK3                        | 7  | 11 | 9  | 4  | Pass | Pass | Pass | 0.86 | PV3299/38895  |  |
| 100 | MAPKAPK5<br>(PRAK)              | -3 | 2  | -1 | 5  | Pass | Pass | Pass | 0.80 | PV3301/880117 |  |
| 100 | MARK1<br>(MARK)                 | 6  | 11 | 9  | 5  | Pass | Pass | Pass | 0.82 | PV4395/877060 |  |
| 100 | MARK2                           | 2  | -6 | -2 | 8  | Pass | Pass | Pass | 0.82 | PV3878/877056 |  |
| 100 | MARK3                           | -6 | 1  | -2 | 7  | Pass | Pass | Pass | 0.87 | PV4819/423469 |  |
| 100 | MARK4                           | 7  | 19 | 13 | 13 | Pass | Pass | Pass | 0.83 | PV3851/304213 |  |
| 100 | MATK<br>(HYL)                   | -7 | -2 | -5 | 4  | Pass | Pass | Pass | 0.94 | PV3370/31553  |  |
| 100 | MELK                            | 29 | 25 | 27 | 4  | Pass | Pass | Pass | 0.88 | PV4823/315179 |  |

|     |                    |    |    |    |    |      |      |      |      |                |
|-----|--------------------|----|----|----|----|------|------|------|------|----------------|
| 100 | MERTK<br>(cMER)    | 2  | 0  | 1  | 2  | Pass | Pass | Pass | 0.92 | PV3627/32658   |
| 100 | MET (cMet)         | 21 | 9  | 15 | 12 | Pass | Pass | Pass | 0.77 | PV3143/625156  |
| 100 | MET<br>M1250T      | -3 | -1 | -2 | 3  | Pass | Pass | Pass | 0.85 | PV3968/34718   |
| 100 | MINK1              | 4  | 3  | 4  | 1  | Pass | Pass | Pass | 0.93 | PV3810/1007109 |
| 100 | MKNK1<br>(MNK1)    | 6  | 8  | 7  | 2  | Pass | Pass | Pass | 0.74 | PV6023/652363  |
| 100 | MST1R<br>(RON)     | -4 | -1 | -2 | 2  | Pass | Pass | Pass | 0.93 | PV4314/765277  |
| 100 | MST4               | 17 | 20 | 19 | 3  | Pass | Pass | Pass | 0.79 | PV3690/33785   |
| 100 | MUSK               | 11 | 5  | 8  | 6  | Pass | Pass | Pass | 0.64 | PV3834/36795   |
| 100 | MYLK2<br>(skMLCK)  | 18 | 12 | 15 | 6  | Pass | Pass | Pass | 0.60 | PV3757/36606   |
| 100 | NEK1               | -1 | 3  | 1  | 4  | Pass | Pass | Pass | 0.72 | PV4202/735797  |
| 100 | NEK2               | 4  | 0  | 2  | 5  | Pass | Pass | Pass | 0.65 | PV3360/549845  |
| 100 | NEK4               | 6  | 2  | 4  | 3  | Pass | Pass | Pass | 0.89 | PV4315/924342  |
| 100 | NEK6               | 4  | 6  | 5  | 2  | Pass | Pass | Pass | 0.78 | PV3353/30778   |
| 100 | NEK7               | -5 | -1 | -3 | 4  | Pass | Pass | Pass | 0.73 | PV3833/34387   |
| 100 | NEK9               | 8  | 2  | 5  | 6  | Pass | Pass | Pass | 0.86 | PV4653/38162   |
| 100 | NTRK1<br>(TRKA)    | -2 | 10 | 4  | 12 | Pass | Pass | Pass | 0.65 | PV3144/792772  |
| 100 | NTRK2<br>(TRKB)    | 3  | 9  | 6  | 6  | Pass | Pass | Pass | 0.95 | PV3616/35706   |
| 100 | NTRK3<br>(TRKC)    | 9  | 26 | 17 | 17 | Pass | Pass | Pass | 0.86 | PV3617/708766  |
| 100 | PAK1               | 0  | 3  | 1  | 3  | Pass | Pass | Pass | 0.83 | PV3820/35463   |
| 100 | PAK2<br>(PAK65)    | 7  | 5  | 6  | 2  | Pass | Pass | Pass | 0.84 | PV4565/545403  |
| 100 | PAK3               | 25 | 7  | 16 | 18 | Pass | Pass | Pass | 0.61 | PV3789/34118   |
| 100 | PAK4               | -3 | -5 | -4 | 1  | Pass | Pass | Pass | 0.83 | PV4212/35324   |
| 100 | PAK6               | 14 | 10 | 12 | 4  | Pass | Pass | Pass | 0.76 | PV3502/31794   |
| 100 | PAK7<br>(KIAA1264) | 0  | 1  | 1  | 1  | Pass | Pass | Pass | 0.59 | PV4405/36846   |



|     |                            |    |     |    |    |      |      |      |      |               |
|-----|----------------------------|----|-----|----|----|------|------|------|------|---------------|
| 100 | PASK                       | 14 | 2   | 8  | 12 | Pass | Pass | Pass | 0.80 | PV3972/762487 |
| 100 | PDGFRA<br>(PDGFR<br>alpha) | 15 | 12  | 14 | 3  | Pass | Pass | Pass | 0.82 | PV3811/682476 |
| 100 | PDGFRA<br>D842V            | -1 | 10  | 4  | 11 | Pass | Pass | Pass | 0.86 | PV4203/269691 |
| 100 | PDGFRA<br>T674I            | 26 | 12  | 19 | 13 | Pass | Pass | Pass | 0.63 | PV3847/35891  |
| 100 | PDGFRA<br>V561D            | 11 | 15  | 13 | 4  | Pass | Pass | Pass | 0.79 | PV4680/38719  |
| 100 | PDGFRB<br>(PDGFR<br>beta)  | -1 | -2  | -2 | 2  | Pass | Pass | Pass | 0.76 | P3082/27567   |
| 100 | PDK1                       | 8  | 18  | 13 | 10 | Pass | Pass | Pass | 0.81 | P3001/35371   |
| 100 | PDK1<br>Direct             | 9  | 6   | 8  | 2  | Pass | Pass | Pass | 0.73 | P3001/35371   |
| 100 | PHKG1                      | 16 | 14  | 15 | 2  | Pass | Pass | Pass | 0.79 | PV3853/555813 |
| 100 | PHKG2                      | -7 | 6   | 0  | 13 | Pass | Pass | Pass | 0.71 | PV4555/37321  |
| 100 | PIM1                       | 60 | 60  | 60 | 1  | Pass | Pass | Pass | 0.73 | PV3503/811382 |
| 100 | PIM2                       | 9  | 5   | 7  | 4  | Pass | Pass | Pass | 0.84 | PV3649/32930  |
| 100 | PKN1<br>(PRK1)             | 20 | 19  | 19 | 1  | Pass | Pass | Pass | 0.76 | PV3790/356552 |
| 100 | PLK1                       | -6 | -5  | -5 | 2  | Pass | Pass | Pass | 0.80 | PV3501/39441  |
| 100 | PLK2                       | -2 | 10  | 4  | 12 | Pass | Pass | Pass | 0.84 | PV4204/38798  |
| 100 | PLK3                       | 0  | -11 | -6 | 11 | Pass | Pass | Pass | 0.61 | PV3812/38812  |
| 100 | PRKACA<br>(PKA)            | -3 | -2  | -2 | 1  | Pass | Pass | Pass | 0.76 | P2912/37377   |
| 100 | PRKCA<br>(PKC alpha)       | -3 | 0   | -1 | 3  | Pass | Pass | Pass | 0.82 | P2232/38479   |
| 100 | PRKCB1<br>(PKC beta<br>I)  | 6  | 13  | 10 | 7  | Pass | Pass | Pass | 0.80 | P2291/299686  |
| 100 | PRKCB2<br>(PKC beta<br>II) | -1 | 8   | 4  | 9  | Pass | Pass | Pass | 0.84 | P2251/306499  |
| 100 | PRKCD<br>(PKC delta)       | -1 | 0   | -1 | 1  | Pass | Pass | Pass | 0.91 | P2293/39038   |

|     |                                  |     |    |     |    |      |      |      |      |               |
|-----|----------------------------------|-----|----|-----|----|------|------|------|------|---------------|
| 100 | PRKCE<br>(PKC<br>epsilon)        | -13 | -9 | -11 | 3  | Pass | Pass | Pass | 0.79 | P2292/37717   |
| 100 | PRKCG<br>(PKC<br>gamma)          | 6   | 8  | 7   | 3  | Pass | Pass | Pass | 0.71 | P2233/39126   |
| 100 | PRKCH<br>(PKC eta)               | 0   | 2  | 1   | 1  | Pass | Pass | Pass | 0.80 | P2633/25059   |
| 100 | PRKCI<br>(PKC iota)              | -2  | 5  | 2   | 7  | Pass | Pass | Pass | 0.91 | PV3183/28662  |
| 100 | PRKCN<br>(PKD3)                  | -4  | 6  | 1   | 10 | Pass | Pass | Pass | 0.58 | PV3692/33787  |
| 100 | PRKCQ<br>(PKC theta)             | 15  | 9  | 12  | 6  | Pass | Pass | Pass | 0.89 | P2996/26231   |
| 100 | PRKCZ<br>(PKC zeta)              | 1   | 12 | 7   | 11 | Pass | Pass | Pass | 0.75 | P2273/31602   |
| 100 | PRKD1<br>(PKC mu)                | 0   | 12 | 6   | 12 | Pass | Pass | Pass | 0.88 | PV3791/34226  |
| 100 | PRKD2<br>(PKD2)                  | 2   | 8  | 5   | 6  | Pass | Pass | Pass | 0.68 | PV3758/34015  |
| 100 | PRKG1                            | -3  | -1 | -2  | 2  | Pass | Pass | Pass | 0.78 | PV4340/36099  |
| 100 | PRKG2<br>(PKG2)                  | 9   | 19 | 14  | 10 | Pass | Pass | Pass | 0.78 | PV3973/273926 |
| 100 | PRKX                             | 7   | 10 | 8   | 4  | Pass | Pass | Pass | 0.72 | PV3813/34283  |
| 100 | PTK2 (FAK)                       | 2   | 4  | 3   | 2  | Pass | Pass | Pass | 0.90 | PHO3141/37750 |
| 100 | PTK2B<br>(FAK2)                  | -7  | 0  | -4  | 7  | Pass | Pass | Pass | 0.94 | PV4567/883370 |
| 100 | PTK6 (Brk)                       | -3  | 3  | 0   | 6  | Pass | Pass | Pass | 0.73 | PV3291/104298 |
| 100 | RAF1<br>(cRAF)<br>Y340D<br>Y341D | -13 | -4 | -9  | 9  | Pass | Pass | Pass | 0.84 | PV3805/835989 |
| 100 | RET                              | -6  | -3 | -4  | 3  | Pass | Pass | Pass | 0.91 | PV3819/571760 |
| 100 | RET V804L                        | -1  | 0  | -1  | 1  | Pass | Pass | Pass | 0.95 | PV4397/36640  |
| 100 | RET Y791F                        | -3  | -1 | -2  | 2  | Pass | Pass | Pass | 0.93 | PV4396/36639  |
| 100 | ROCK1                            | 6   | -1 | 2   | 7  | Pass | Pass | Pass | 0.83 | PV3691/37178  |
| 100 | ROCK2                            | 0   | -7 | -4  | 7  | Pass | Pass | Pass | 0.79 | PV3759/843703 |

|     |                     |     |     |     |    |      |      |      |      |               |
|-----|---------------------|-----|-----|-----|----|------|------|------|------|---------------|
| 100 | ROS1                | -2  | 0   | -1  | 2  | Pass | Pass | Pass | 0.87 | PV3814/479684 |
| 100 | RPS6KA1<br>(RSK1)   | 5   | 12  | 9   | 7  | Pass | Pass | Pass | 0.86 | PV3680/880119 |
| 100 | RPS6KA2<br>(RSK3)   | 19  | 21  | 20  | 1  | Pass | Pass | Pass | 0.84 | PV3846/34468  |
| 100 | RPS6KA3<br>(RSK2)   | 24  | 22  | 23  | 2  | Pass | Pass | Pass | 0.72 | PV3323/378153 |
| 100 | RPS6KA4<br>(MSK2)   | 9   | 8   | 8   | 1  | Pass | Pass | Pass | 0.80 | PV3782/990109 |
| 100 | RPS6KA5<br>(MSK1)   | -3  | 7   | 2   | 10 | Pass | Pass | Pass | 0.71 | PV3681/33702  |
| 100 | RPS6KA6<br>(RSK4)   | 31  | 35  | 33  | 4  | Pass | Pass | Pass | 0.58 | PV4557/37496  |
| 100 | RPS6KB1<br>(p70S6K) | 5   | 5   | 5   | 1  | Pass | Pass | Pass | 0.88 | PV3815/38944  |
| 100 | SGK<br>(SGK1)       | -12 | -21 | -17 | 8  | Pass | Pass | Pass | 0.76 | PV3818/34366  |
| 100 | SGK2                | 6   | 11  | 9   | 5  | Pass | Pass | Pass | 0.84 | PV3858/34433  |
| 100 | SGKL<br>(SGK3)      | -10 | 9   | 0   | 18 | Pass | Pass | Pass | 0.82 | PV3859/38954  |
| 100 | SNF1LK2             | -1  | 18  | 9   | 20 | Pass | Pass | Pass | 0.70 | PV4792/719848 |
| 100 | SRC                 | 9   | 10  | 10  | 1  | Pass | Pass | Pass | 0.85 | P3044/26726   |
| 100 | SRC N1              | -4  | 0   | -2  | 4  | Pass | Pass | Pass | 0.85 | P2904/21068   |
| 100 | SRMS<br>(Srm)       | 9   | 3   | 6   | 5  | Pass | Pass | Pass | 0.85 | PV4214/860773 |
| 100 | SRPK1               | 19  | 18  | 18  | 0  | Pass | Pass | Pass | 0.59 | PV4215/35335  |
| 100 | SRPK2               | 15  | 20  | 18  | 4  | Pass | Pass | Pass | 0.70 | PV3829/725393 |
| 100 | STK22B<br>(TSSK2)   | 1   | 5   | 3   | 4  | Pass | Pass | Pass | 0.66 | PV3622/32396  |
| 100 | STK22D<br>(TSSK1)   | 2   | 2   | 2   | 0  | Pass | Pass | Pass | 0.87 | PV3505/947248 |
| 100 | STK23<br>(MSSK1)    | -11 | -11 | -11 | 1  | Pass | Pass | Pass | 0.74 | PV3880/889510 |
| 100 | STK24<br>(MST3)     | -3  | -8  | -6  | 6  | Pass | Pass | Pass | 0.56 | PV3650/32932  |
| 100 | STK25<br>(YSK1)     | -6  | -5  | -5  | 0  | Pass | Pass | Pass | 0.85 | PV3657/33163  |

|     |                 |    |    |    |    |      |      |      |      |               |
|-----|-----------------|----|----|----|----|------|------|------|------|---------------|
| 100 | STK3<br>(MST2)  | -2 | 2  | 0  | 4  | Pass | Pass | Pass | 0.82 | PV4805/371195 |
| 100 | STK4<br>(MST1)  | -1 | -1 | -1 | 1  | Pass | Pass | Pass | 0.85 | PV3854/38395  |
| 100 | SYK             | 2  | 2  | 2  | 0  | Pass | Pass | Pass | 0.93 | PV3857/756818 |
| 100 | TAOK2<br>(TAO1) | 0  | -3 | -2 | 3  | Pass | Pass | Pass | 0.79 | PV3760/759946 |
| 100 | TBK1            | -5 | -2 | -4 | 3  | Pass | Pass | Pass | 0.92 | PV3504/857011 |
| 100 | TEK (Tie2)      | 2  | 4  | 3  | 2  | Pass | Pass | Pass | 0.89 | PV3628/34398  |
| 100 | TXK             | 0  | -4 | -2 | 3  | Pass | Pass | Pass | 0.73 | PV5860/750657 |
| 100 | TYK2            | -7 | -5 | -6 | 2  | Pass | Pass | Pass | 0.57 | PV4790/884908 |
| 100 | TYRO3<br>(RSE)  | 15 | 16 | 16 | 1  | Pass | Pass | Pass | 0.89 | PV3828/68475  |
| 100 | YES1            | -2 | 5  | 1  | 8  | Pass | Pass | Pass | 0.87 | P3078/27228   |
| 100 | ZAP70           | -3 | 9  | 3  | 12 | Pass | Pass | Pass | 0.95 | P2782/843705  |

**Table S2.** Kinase Inhibitor Profiling Data. 1 $\mu$ M **Star 12** was analyzed for inhibitory activity against 308 human kinases using SelectScreen® Profiling Services from Life Technologies. The inhibitor was tested against each kinase in duplicate and average values were plotted in Figure 4. The LanthaScreen Binding Assay was used if there was not an activity assay (Z'Lyte or Adapta Screens) available for a particular kinase. Experimental details for each kinase and each assay can be found at <http://www.lifetechnologies.com/us/en/home/products-and-services/services/custom-services/screening-and-profiling-services/selectscreen-profiling-service/selectscreen-kinase-profiling-service.html>.

## Supplemental Schemes

### Diazolactam Synthesis

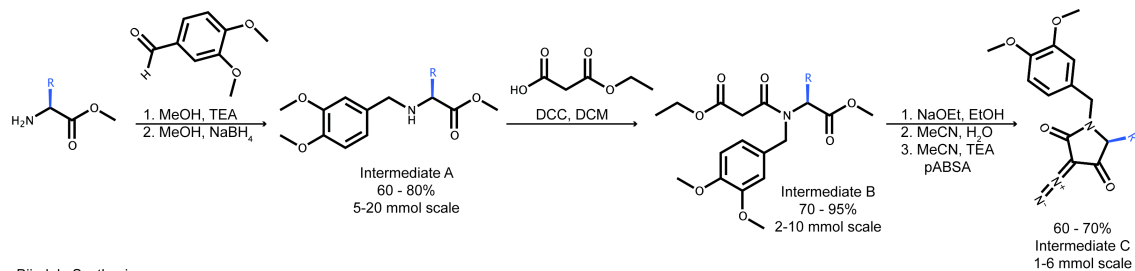

### Biindole Synthesis

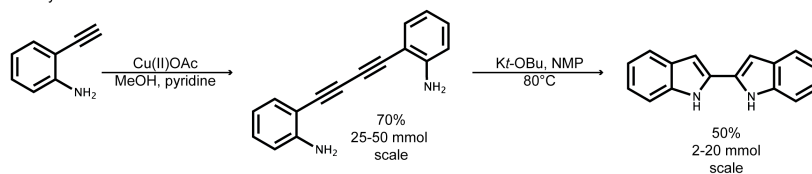

### Indolocarbazole Synthesis

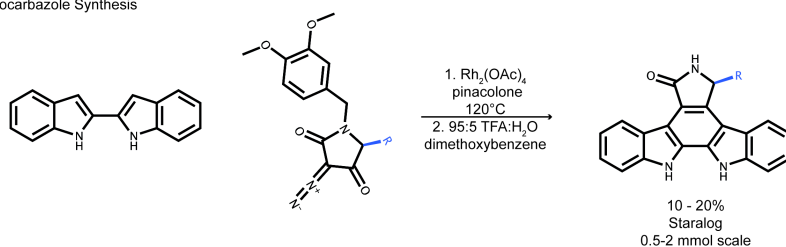

**Scheme S1.** Synthetic approach<sup>2</sup> for construction of staralog derivatives. Diazolactam derivatives are synthesized from appropriate commercially available L-amino acid methyl esters. Biindole is prepared in two steps from 2-alkynyl aniline. Indolocarbazole is formed via a rhodium catalyzed coupling of the diazolactam and biindole building blocks.

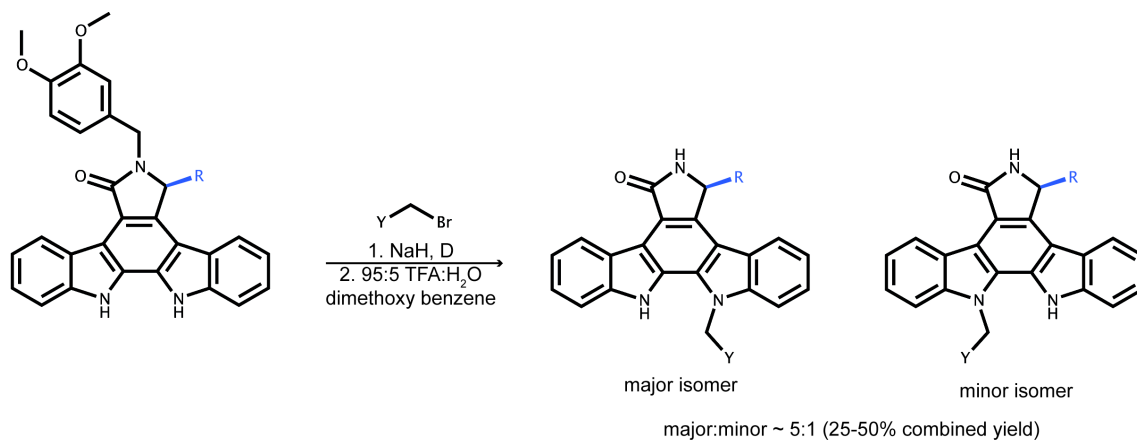

**Scheme S2.** Synthetic approach<sup>3</sup> for installing N12 and N13 substituents. Major product is alkylation at N12 and minor product is alkylation at N13. 3,4-dimethoxybenzyl group as well as other Y-protecting groups (Boc, etc.) were removed with TFA in methylene chloride and scavenger dimethoxy benzene. Regiochemistry of the alkylations were determined by <sup>1</sup>H NMR (described in ref. 3) and relative shift by liquid chromatography where the major isomer (N12-alkylated) migrated more quickly than the minor isomer (N13-alkylated). Finally, the regiochemistry was further confirmed by X-ray co-crystallography of **Star 12** (Figure 3) and **Star 16** (unpublished data) bound to Src-AS1.

## **Supplemental Methods**

### ***In Vitro* Kinases Assays:**

**Src Kinase.** 6xHis-tagged Src (257-533), Src-AS1 (T338G), and Src-AS2 (T338A) were expressed in BL-21 *E. coli* cells as previously described<sup>4</sup>. Kinase activity was assayed under the following conditions: 2nM Src kinase, 50mM TRIS (pH 8.0), 10mM MgCl<sub>2</sub>, 100μM Src peptide substrate (IYGEFKKK), 100μM ATP, 0.5μCi <sup>32</sup>P-ATP, 2% DMSO, and variable concentrations of inhibitors (5 μM to 1.2 nM). 2 μL of the reaction mixture was placed onto P81 paper at various time points and evaporated under a heat lamp for 5 min. The P81 paper was washed with 1% phosphoric acid, dried, and exposed to phosphor-imaging screen. Radioactivity was measured using a Typhoon fluorescence imager (Molecular Dynamics) and IC<sub>50</sub> values were determined by fitting the data to a sigmoid function in Prism 4.0 (GraphPad Software).

**CK1δ and CK1ε.** Casein Kinase 1δ (catalog # PV3665) and Casein Kinase 1ε (catalog # PV3500) were purchased from Life Technologies and assayed under the following conditions: 50mM TRIS (pH 8.0), 10mM MgCl<sub>2</sub>, 0.4 mg/mL casein, 2.5 mM DTT, 2% DMSO, 5nM kinase, 100μM ATP, 0.1 mg/mL BSA, 1μCi <sup>32</sup>P-ATP and various concentrations of inhibitors (5 μM to 1.2 nM). 2 μL of the reaction mixture was placed onto P81 paper at various time points and evaporated under a heat lamp for 5 min. The P81 paper was washed with 1% phosphoric acid, dried, and exposed to phosphor-imaging screen. Radioactivity was measured using a Typhoon fluorescence imager (Molecular Dynamics) and IC<sub>50</sub> values were determined by fitting the data to a sigmoid function in Prism 4.0 (GraphPad Software).

**PKD1 and PKD2.** PKD1 (catalog # PV3791) and PKD2 (catalog # PV3758) were purchased from Life Technologies and assayed under the following conditions: 50 mM TRIS (pH 8.0), 10 mM MgCl<sub>2</sub>, 2mM DTT, 2% DTT, 0.1 mg/mL BSA, 100 μM ATP, 3 μCi <sup>32</sup>P-ATP, 7 nM kinase and various concentrations of inhibitors (5 μM to 1.2 nM). 2 μL of the reaction mixture was placed onto P81 paper at various time points and evaporated under a heat lamp for 5 min. The P81 paper was washed with 1% phosphoric

acid, dried, and exposed to phosphor-imaging screen. Radioactivity was measured using a Typhoon fluorescence imager (Molecular Dynamics) and IC<sub>50</sub> values were determined by fitting the data to a sigmoid function in Prism 4.0 (GraphPad Software).

**RET and ACK.** RET (catalog # PV3819) and ACK (catalog # PV4807) were purchased from Life Technologies and assayed under the following conditions: 50 mM TRIS (pH 8.0), 10 mM MgCl<sub>2</sub>, 2 mM DTT, 0.1 mg/mL BSA, 2% DMSO, 200 μM Abltide, 10 nM kinase, 100 μM ATP, 1 μCi <sup>32</sup>P-ATP and variable concentrations of inhibitors (5 μM to 1.2 nM). 2 μL of the reaction mixture was placed onto P81 paper at various time points and evaporated under a heat lamp for 5 min. The P81 paper was washed with 1% phosphoric acid, dried, and exposed to phosphor-imaging screen. Radioactivity was measured using a Typhoon fluorescence imager (Molecular Dynamics) and IC<sub>50</sub> values were determined by fitting the data to a sigmoid function in Prism 4.0 (GraphPad Software).

**EPHA1 and PTK6.** EPHA1 (catalog # 3841) and PTK6 (catalog # 3291) were purchased from Life Technologies and assayed under the following conditions: 50 mM TRIS (pH 8.0), 10 mM MgCl<sub>2</sub>, 2.5 mM DTT, 0.1 mg/mL BSA, 2% DMSO, 0.2 mg/mL poly[Glu, Tyr] 4:1, 2 nM kinase, 100 μM ATP, 1 μCi <sup>32</sup>P-ATP and variable concentrations of inhibitors (5 μM to 1.2 nM). 2 μL of the reaction mixture was placed onto P81 paper at various time points and evaporated under a heat lamp for 5 min. The P81 paper was washed with 1% phosphoric acid, dried, and exposed to phosphor-imaging screen. Radioactivity was measured using a Typhoon fluorescence imager (Molecular Dynamics) and IC<sub>50</sub> values were determined by fitting the data to a sigmoid function in Prism 4.0 (GraphPad Software).

### **Cellular Kinases Assays:**

#### **v-Src-WT and v-Src-AS1**

NIH-3T3 cell lines transformed with v-Src gatekeeper variants were prepared using the procedure of Bishop et al.<sup>5</sup>. 5x10<sup>5</sup> cells were seeded in each well of a 6-well dish and grown overnight at 37°C with 5% CO<sub>2</sub> in Dulbecco's Modified Eagle Medium (DMEM) supplemented with 10% Fetal Bovine Serum (FBS). The next day the medium was



removed and replaced with 1.5ml of fresh DMEM (+10% FBS) containing inhibitor and a final concentration of 1% DMSO. The cells were incubated with drug medium for 1.5 hours, washed with cold PBS, and lysed with 150  $\mu$ L buffer (50 mM Tris (pH 7.4), 150 mM NaCl, 1 mM EDTA, 1 mM EGTA, 1 mM Na<sub>3</sub>VO<sub>4</sub>, 10 mM sodium- $\beta$ -glycerophosphate, 1% triton, 50 mM NaF, 5 mM sodium pyrophosphate, 0.27 M sucrose, 50 mM benzamidine, 1 complete mini protease inhibitor tablet (Roche), 1 mM PMSF, 1 PhosSTOP (Roche) phosphatase inhibitor tablet, 0.1 mg/ml RNase A, and 0.1 mg/ml DNase I), normalized for concentration and analyzed by Western blot for global phosphotyrosine levels (4G10, Millipore, 1:5000) and  $\beta$ -actin ( $\beta$ -actin Antibody, Cell Signaling, 1:1000).

### **EphA4-WT and EphA4-AS1**

3x10<sup>5</sup> HEK-293T cells were seeded into each well of a six-well tissue culture plate and grown in 2 mL DMEM (+10% FBS) at 37°C under 5% CO<sub>2</sub> for 12-18 hrs. pCS2+ plasmids containing full length EphA4-WT or EphA4-AS1(T640G) were transfected into HEK 293T cells using Lipofectamine®, LTX and PLUS reagent (Life Technologies) and the cells returned to 37°C 5% CO<sub>2</sub> incubator for 12-18 hrs. The next day the medium was removed and replaced with 1.5ml of fresh DMEM (+10% FBS) containing inhibitor and a final concentration of 1% DMSO. The cells were incubated with drug medium for 1.5 hours, washed with cold PBS, and lysed with 150  $\mu$ L buffer (50 mM Tris (pH 7.4), 150 mM NaCl, 1 mM EDTA, 1 mM EGTA, 1 mM Na<sub>3</sub>VO<sub>4</sub>, 10 mM sodium- $\beta$ -glycerophosphate, 1% triton, 50 mM NaF, 5 mM sodium pyrophosphate, 0.27 M sucrose, 50 mM benzamidine, 1 complete mini protease inhibitor tablet (Roche), 1 mM PMSF, 1 PhosSTOP (Roche) phosphatase inhibitor tablet, 0.1 mg/ml RNase A, and 0.1 mg/ml DNase I), normalized for concentration and the proteins were separated by SDS-PAGE. Next, the proteins were transferred to nitrocellulose and probed with pEph (provided by Greenberg Lab<sup>6</sup>, 1:1000) and total EphA4 (anti-EphA4, Santa Cruz Biotechnology, 1:1000) primary antibodies, and fluorescent secondary antibodies (LICOR, anti-rabbit IgG, 800nm). Phospho-Eph and total EphA4 were imaged and quantified using a LI-COR Odyssey Quantitative Quantitative Imaging System. The ratio of phospho-Eph/Total Eph

was plotted as a function of drug concentration and the error represents the standard error from the mean (SEM) for three experiments.

### **Pkd1-WT, Pkd1-AS1, and Pkd1-AS2**

$3 \times 10^5$  HEK-293T cells were seeded into each well of a six-well tissue culture plate and grown in 2 mL DMEM (+10% FBS) at 37°C under 5% CO<sub>2</sub> for 12-18 hrs. Venus-Pkd1-WT, Venus-Pkd1-AS1 (M665G), or Venus-Pkd1-AS2 (M665A)<sup>7</sup> were transfected into HEK 293T cells using Lipofectamine®, LTX and PLUS reagent (Life Technologies) and the cells returned to 37°C 5% CO<sub>2</sub> incubator for 12-18 hrs. The next day the medium was removed and replaced with 1.5ml of fresh DMEM (+10% FBS) containing inhibitor and a final concentration of 1% DMSO. The cells were incubated with drug medium for 1.5 hours, washed with cold PBS, and lysed with 150 µL buffer (50 mM Tris (pH 7.4), 150 mM NaCl, 1 mM EDTA, 1 mM EGTA, 1 mM Na<sub>3</sub>VO<sub>4</sub>, 10 mM sodium-β-glycerophosphate, 1% triton, 50 mM NaF, 5 mM sodium pyrophosphate, 0.27 M sucrose, 50 mM benzamidine, 1 complete mini protease inhibitor tablet (Roche), 1 mM PMSF, 1 PhosSTOP (Roche) phosphatase inhibitor tablet, 0.1 mg/ml RNase A, and 0.1 mg/ml DNase I), normalized for concentration and analyzed by Western blot for pS916 Pkd1 (Cell Signaling # 2051, 1:1000) and total Pkd1 (Cell Signaling # 2052, 1:1000).

### **Kif5b-Ret-WT and Kif5b-Ret-AS2**

The KIF5B-RET WT cDNA was cloned into pBABE-Puro vectors using SLIC-cloning<sup>8</sup> and the V804A-AS mutation was introduced by site-directed mutagenesis. Replication-incompetent retroviruses were produced in Phoenix-Eco HEK 293T cells. Supernatant was filtered and used at 1:2 dilutions for transduction of NIH3T3 cells that were selected with puromycin (1.0 µg/ml).  $5 \times 10^5$  cells were seeded in each well of a 6-well dish and grown overnight at 37°C with 5% CO<sub>2</sub> in Dulbecco's Modified Eagle Medium (DMEM) supplemented with 10% Fetal Bovine Serum (FBS) and puromycin. The next day the medium was removed and replaced with 1.5ml of fresh DMEM (+10% FBS, +1µ/mL

puromycin) containing inhibitor and a final concentration of 1% DMSO. The cells were incubated with drug medium for 1.5 hours, washed with cold PBS, and lysed with 150  $\mu$ L buffer (50 mM Tris (pH 7.4), 150 mM NaCl, 1 mM EDTA, 1 mM EGTA, 1 mM  $\text{Na}_3\text{VO}_4$ , 10 mM sodium- $\beta$ -glycerophosphate, 1% triton, 50 mM NaF, 5 mM sodium pyrophosphate, 0.27 M sucrose, 50 mM benzamidine, 1 complete mini protease inhibitor tablet (Roche), 1 mM PMSF, 1 PhosSTOP (Roche) phosphatase inhibitor tablet, 0.1 mg/ml RNase A, and 0.1 mg/ml DNase I), normalized for concentration and analyzed by Western blot for Ret autophosphorylation (anti-pY905, Cell Signaling # 3221, 1:1000) and total Ret (anti-Ret, Cell Signaling # 3220, 1:1000).

### **Crystalization and Data Collection**

Prior to crystallization, purified c-Src-AS1 was applied to a S200 gel filtration column. Pooled fractions were concentrated to 3-10mg/mL and mixed with **Star 12** (1:1.3 ratio of protein:inhibitor) in 100 mM NaCl, 50 mM Tris [pH 8.0], 5% glycerol, 1 mM DTT, and 4% DMSO. Hanging drops containing 1  $\mu$ L of kinase-inhibitor complexes were mixed with equal volume of well buffer containing 8% PEG 4K, 50 mM NaAc, 100 mM MES [pH 6.5] and grown at 14°C to yield c-Src-AS1-**Star 12** crystals. Crystals were cryo-protected in well buffer supplemented with 20% glycerol and flash frozen in liquid nitrogen. Diffraction data were collected at -170°C and processing was carried out using HKL2000 (HKL Research Inc.). The structure was solved by molecular replacement using 1YOJ<sup>9</sup> lacking the activation segment, helix  $\alpha$ C, and ligands as the search model in the program PHASER<sup>10</sup>. Molecular replacement solutions were modified and refined with alternate cycles of manual fitting and building into  $|2\text{Fo}-\text{Fc}|$  and composite omit electron density maps using Coot<sup>11</sup>. Refinement of the structures was carried out using Phenix<sup>12</sup>. Data collection and refinement statistics are shown in supplementary Table S1. All structural figures were prepared with PYMOL (The PyMOL Molecular Graphics System, Version 1.5.0.4 Schrödinger, LLC). Structure has been deposited in the Protein Data Bank under ID code 4MCV.

## Chemical Synthesis

**General Methods:** Reactions were performed in flame-dried flasks under argon with magnetic stirring. All  $^{13}\text{C}$  and  $^1\text{H}$  NMR spectra were recorded on a Varian Innova 400 spectrometer and referenced to solvent peaks. chemical shifts are reported in  $\delta$  (ppm) as s (singlet), d (doublet), t (triplet), q (quartet), m (multiplet) or br (broad). Low resolution mass spectra (LC/ESI-MS) were recorded on a Waters Micromass ZQ equipped with a Waters 2695 Separations Module and a XTerra MS C18 3.5 mm column (Waters). Pinacolone was freshly distilled before use and all other commercial reagents were used without further purification. All RP-HPLC were performed on a Varian ProStar solvent delivery system equipped with a Zorbax 300-SB C18 column using  $\text{H}_2\text{O}$  + 0.1% formic acid and  $\text{CH}_3\text{CN}$  + 0.1% formic acid (1-100% gradient) and monitoring at 260 nm.

## Compound Characterization

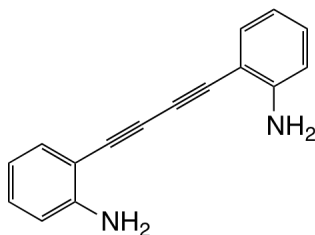

**2,2'-(buta-1,3-diyne-1,4-diyl)dianiline**  $^1\text{H}$  NMR ( $d_6$  DMSO, 400 MHz)  $\delta$  5.60 (s, 2H), 6.48 (t, 1H,  $J = 8\text{Hz}$ ), 6.68 (d, 1H,  $J = 8\text{Hz}$ ), 7.07 (t, 1H,  $J = 8\text{Hz}$ ), 7.19 (d, 1H,  $J = 8\text{Hz}$ );  $^{13}\text{C}$  NMR ( $d_6$  DMSO, 400 MHz)  $\delta$  79.79, 81.53, 104.83, 115.30, 117.07, 131.95, 133.78, 152.80; LCMS: calculated  $[\text{M}+\text{H}]^+ = 233.10$ , found = 233.22.

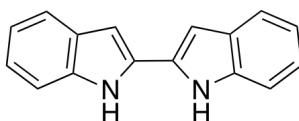

**1H,1'H-2,2'-biindole**  $^1\text{H}$  NMR ( $d_6$  DMSO, 400 MHz)  $\delta$  6.89 (s, 2H), 6.98 (t, 2H,  $J = 8\text{Hz}$ ), 7.08 (t, 2H,  $J = 8\text{Hz}$ ), 7.37 (d, 2H,  $J = 4\text{Hz}$ ), 7.53 (d, 2H,  $J = 4\text{Hz}$ );  $^{13}\text{C}$  NMR ( $d_6$  DMSO, 400 MHz)  $\delta$  99.05, 111.69, 120.04, 120.67, 122.33, 129.08, 132.05, 137.55; LCMS: calculated  $[\text{M}+\text{H}]^+ = 233.10$ , found = 233.18.

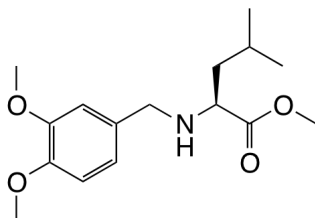

**(S)-methyl 2-((3,4-dimethoxybenzyl)amino)-4-methylpentanoate (Star 1a)**  $^1\text{H}$  NMR ( $d_6$  DMSO, 400 MHz)  $\delta$  0.75 (d, 3H,  $J = 2\text{Hz}$ ), 0.82 (d, 3H,  $J = 2\text{Hz}$ ), 1.30 – 1.38 (m, 2H), 1.66 – 1.76 (m, 1H), 2.24 (s, 2H), 3.13 (t, 1H,  $J = 8\text{Hz}$ ), 3.43 (d, 1H,  $J = 16\text{Hz}$ ), 3.62 (d, 1H,  $J = 16\text{Hz}$ ), 3.69 (s, 3H), 3.70 (s, 3H), 6.75 (d, 1H,  $J = 8\text{Hz}$ ), 6.82 (d, 1H,  $J = 8\text{Hz}$ ), 6.89 (s, 1H);  $^{13}\text{C}$  NMR ( $d_6$ DMSO, 400 MHz)  $\delta$  22.58, 23.34, 25.02, 42.68, 50.30, 51.33, 55.92, 58.82, 112.11, 112.18, 112.32, 120.55, 133.39, 148.34, 149.28, 176.31; LCMS: calculated  $[\text{M}+\text{H}]^+ = 296.18$ , found = 296.33.

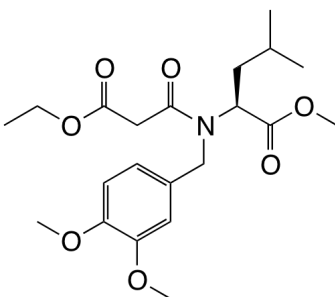

**(S)-methyl 2-(N-(3,4-dimethoxybenzyl)-3-ethoxy-3-oxopropanamido)-4-methylpentanoate (Star 1b)**  $^1\text{H}$  NMR ( $d_6$  DMSO, 400 MHz)  $\delta$  0.71 (d, 3H,  $J = 4\text{Hz}$ ), 0.77 (d, 3H,  $J = 4\text{Hz}$ ), 1.13 – 1.20 (3H), 1.46 – 1.53 (m, 2H), 1.73 – 1.75 (m, 1H), 3.50 (s, 3H), 3.67 (d, 2H,  $J = 4\text{Hz}$ ), 3.71 (s, 3H), 3.72 (s, 3H), 4.01 – 4.12 (m, 2H), 6.73 – 6.95 (m, 3H);  $^{13}\text{C}$  NMR ( $d_6$ DMSO, 400 MHz) 14.58, 14.62, 22.72, 23.17, 25.09, 38.56, 41.77, 51.19, 52.40, 55.54, 56.04, 56.18, 61.25, 111.75, 112.32, 129.73, 148.81, 149.32, 167.59, 167.99, 171.72; LCMS: calculated  $[\text{M}+\text{Na}]^+ = 432.20$ , found = 432.33.

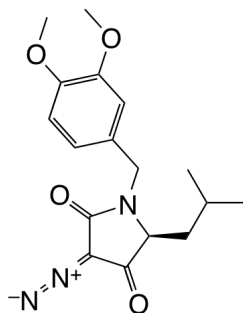

**(S)-3-diazo-1-(3,4-dimethoxybenzyl)-5-isobutylpyrrolidine-2,4-dione (Star 1c)** <sup>1</sup>H NMR (CDCl<sub>3</sub>, 400 MHz) δ 0.80 (d, 3H, *J* = 8Hz), 0.85 (d, 3H, *J* = 8Hz), 1.57 – 1.64 (m, 2H), 1.78 – 1.88 (m, 1H), 3.65 – 3.68 (m, 1H), 3.86 (d, 1H, *J* = 16Hz), 5.12 (d, 1H, *J* = 16Hz), 6.72 – 6.77 (m, 3H); <sup>13</sup>C NMR (CDCl<sub>3</sub>, 400 MHz) δ 0.17, 38.25, 44.46, 56.10, 56.15, 62.16, 111.36, 111.55, 120.92, 128.17, 149.13, 149.63, 161.92, 189.72; LCMS: calculated [M+H]<sup>+</sup> = 331.15, found = 331.34.

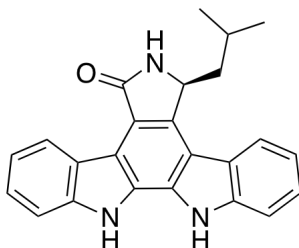

**(S)-7-isobutyl-6,7,12,13-tetrahydro-5H-indolo[2,3-a]pyrrolo[3,4-c]carbazol-5-one (Star 1)** <sup>1</sup>H NMR (d<sub>6</sub> DMSO, 400 MHz) δ 0.79 (d, 3H, *J* = 8Hz), 1.19 (d, 3H, *J* = 8Hz), 1.23 – 1.30 (m, 1H), 1.98 – 2.01 (m, 1H), 2.21 (t, 1H, *J* = 12Hz), 5.22 (d, 1H, *J* = 8Hz), 7.18 (t, 1H, *J* = 8Hz), 7.28 (t, 1H, *J* = 8Hz), 7.38 (t, 1H, *J* = 8Hz), 7.43 (t, 1H, *J* = 8Hz), 7.67 (d, 1H, *J* = 8Hz), 7.75 (d, 1H, *J* = 8Hz), 8.80 (d, 1H, *J* = 8Hz), 8.73 (s, 1H), 9.18 (d, 1H, *J* = 8Hz); <sup>13</sup>C NMR (d<sub>6</sub> DMSO, 400 MHz) δ 22.39, 24.68, 25.84, 44.77, 55.44, 112.00, 112.77, 114.17, 116.18, 119.09, 119.57, 120.52, 122.19, 122.73, 123.47, 125.53, 125.72, 125.98, 126.26, 128.90, 138.42, 139.93, 140.14, 164.72, 172.39; LCMS: calculated [M+H]<sup>+</sup> = 368.17, found = 367.98.

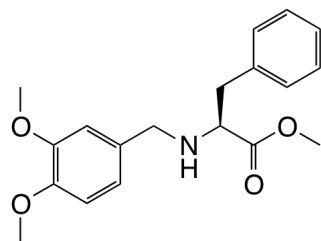

**(S)-methyl 2-((3,4-dimethoxybenzyl)amino)-3-phenylpropanoate (Star 2a)** <sup>1</sup>H NMR (d<sub>6</sub> DMSO, 400 MHz) δ 2.38 (s, 1H), 2.84 (d, 2H, *J* = 8Hz), 3.37 (s, 1H), 3.45 (d, 1H, *J* = 16Hz), 3.53 (s, 3H), 3.62 (s, 3H), 3.65 (d, 1H, *J* = 16Hz), 3.75 (s, 3H), 6.68 (d, 1H, *J* = 8Hz), 6.79 (d, 2H, *J* = 8Hz), 7.14 – 7.25 (m, 5H); <sup>13</sup>C NMR (d<sub>6</sub> DMSO, 400 MHz) δ 51.09, 51.90, 55.89, 56.61, 62.24, 112.11, 112.13, 120.37, 126.92, 128.71, 129.84, 133.20, 138.61, 148.26, 149.26, 175.11; LCMS: calculated [M+H]<sup>+</sup> = 330.16, found = 329.95.

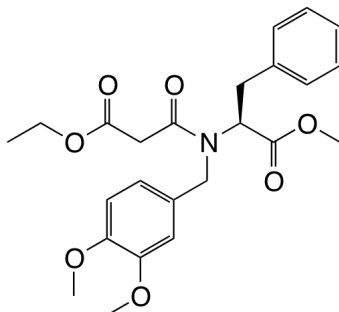

**(S)-ethyl 3-((3,4-dimethoxybenzyl)(1-methoxy-1-oxo-3-phenylpropan-2-yl)amino)-3-oxopropanoate (Star 2b)**  $^1\text{H}$  NMR ( $d_6$  DMSO, 400 MHz)  $\delta$  1.26 (t, 3H,  $J = 7.2\text{Hz}$ ), 1.52 (s, 3H), 3.20 – 3.44 (m, 4H), 3.65 (s, 2H), 3.68 (d, 1H,  $J = 16.8\text{Hz}$ ), 3.79 (s, 3H), 3.83 (s, 3H), 4.17 (q, 2H,  $J = 7.2\text{Hz}$ ), 4.24 (q, 1H,  $J = 4.0\text{Hz}$ ), 4.35 (d, 1H,  $J = 16.8\text{Hz}$ ), 6.57 (dd, 1H,  $J = 2\text{Hz}$ ,  $J = 8\text{Hz}$ ), 6.73 (d, 1H,  $J = 8.4\text{Hz}$ ), 6.76 (d, 1H,  $J = 2\text{Hz}$ ), 7.13 – 7.29 (m, 5H); LCMS: calculated  $[\text{M}+\text{H}]^+ = 444.19$ , found = 444.00.

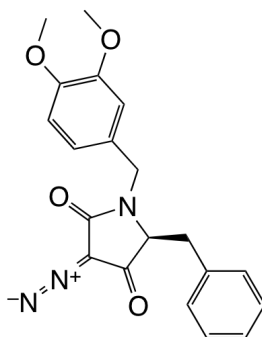

**(S)-5-benzyl-3-diazo-1-(3,4-dimethoxybenzyl)pyrrolidine-2,4-dione (Star 2c)**  $^1\text{H}$  NMR ( $\text{CDCl}_3$ , 400 MHz)  $\delta$  3.05 (dd, 1H,  $J = 5.6\text{Hz}$ ,  $J = 14.4\text{Hz}$ ), 3.17 (dd, 1H,  $J = 4\text{Hz}$ ,  $J = 14.4\text{Hz}$ ), 3.80 (s, 3H), 3.84 (s, 3H), 5.20 (t, 1H,  $J = 4.4\text{Hz}$ ), 5.18 (d, 1H,  $J = 14.8\text{Hz}$ ), 6.58 – 6.62 (m, 2H), 6.76 (d, 1H,  $J = 8\text{Hz}$ ), 7.08 – 7.10 (m, 2H), 7.23 – 7.29 (m, 3H).

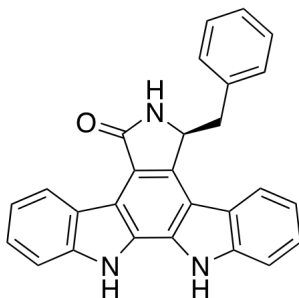

**(S)-7-benzyl-6,7,12,13-tetrahydro-5H-indolo[2,3-a]pyrrolo[3,4-c]carbazol-5-one (Star 2)**  $^1\text{H}$  NMR ( $d_6$  DMSO, 400 MHz)  $\delta$  3.02 – 3.08 (m, 2H), 3.29 (dd, 1H,  $J = 5.6\text{Hz}$ ,  $J = 13.6\text{Hz}$ ), 5.55 (t, 1H,  $J = 4.4\text{Hz}$ ), 6.86 – 6.98 (m, 5H), 7.12 (t, 1H,  $J = 7.2\text{Hz}$ ), 7.34 (m, 2H), 7.47 (t, 1H,  $J = 7.6\text{Hz}$ ), 7.64 (d, 1H,  $J = 8\text{Hz}$ ), 7.78 (d, 1H,  $J = 8\text{Hz}$ ), 8.29 (d, 1H,  $J = 7.6$ ), 8.45 (s, 1H), 9.04 (d, 1H,  $J = 7.6$ ), 11.26 (s, 1H), 11.56 (s, 1H);  $^{13}\text{C}$  NMR ( $d_6$  DMSO, 600 MHz)  $\delta$  39.03, 57.15, 111.76, 112.62, 114.36, 115.75, 119.29, 119.84, 120.45, 122.28, 122.66, 123.17, 125.44, 125.47, 125.76, 126.08, 126.59, 128.08, 128.61, 130.01, 136.25, 136.91, 139.66, 140.04, 171.99; LCMS: calculated  $[\text{M}+\text{H}]^+ = 402.15$ , found = 401.97.

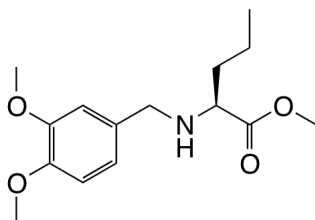

**(S)-methyl 2-((3,4-dimethoxybenzyl)amino)pentanoate (Star 3a)**  $^1\text{H}$  NMR ( $d_6$  DMSO, 400 MHz)  $\delta$  0.80 (t, 3H,  $J = 8\text{Hz}$ ), 1.23 – 1.30 (m, 2H), 1.46 – 1.52 (m, 2H), 2.27 (s, 1H), 3.10 (t, 1H,  $J = 12\text{Hz}$ ), 3.42 (d, 1H,  $J = 12\text{Hz}$ ), 3.60 (s, 3H), 3.63 (d, 1H,  $J = 12\text{Hz}$ ), 3.69 (s, 3H), 3.70 (s, 3H), 6.75 (d, 1H,  $J = 8\text{Hz}$ ), 6.82 (d, 1H,  $J = 8\text{Hz}$ ), 6.88 (s, 1H);  $^{13}\text{C}$  NMR ( $d_6$  DMSO, 400 MHz)  $\delta$  14.35, 19.32, 35.57, 51.33, 51.90, 55.97, 56.15, 60.15, 112.17, 112.33, 120.50, 133.42, 148.30, 149.28, 176.02; LCMS: calculated  $[\text{M}+\text{H}]^+ = 282.16$ , found = 282.32.



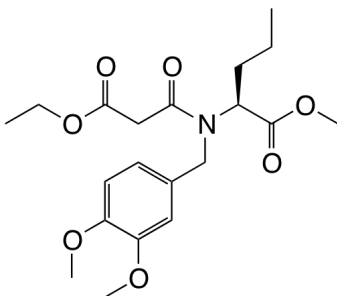

**(S)-methyl 2-(N-(3,4-dimethoxybenzyl)-3-ethoxy-3-oxopropanamido)pentanoate (Star 3b)**  $^1\text{H}$  NMR ( $d_6$  DMSO, 400 MHz)  $\delta$  0.66 – 0.79 (m, 3H), 1.12 – 1.17 (m, 5H), 1.63 – 1.81 (m, 2H), 3.32 – 3.51 (m, 1H), 3.48 (s, 3H), 3.71 (s, 3H), 3.72 (s, 3H), 3.99 – 4.11 (m, 2H), 4.23 – 4.29 (m, 1H), 4.42 – 4.56 (2H), 6.76 – 6.97 (m, 3H);  $^{13}\text{C}$  NMR ( $d_6$  DMSO, 400 MHz)  $\delta$  14.41, 14.49, 19.73, 41.72, 51.80, 52.33, 56.03, 56.17, 59.01, 61.25, 111.74, 112.29, 120.03, 129.78, 148.76, 149.40, 167.41, 168.00, 171.51; LCMS: calculated  $[\text{M}+\text{H}]^+ = 396.19$ , found = 396.32.

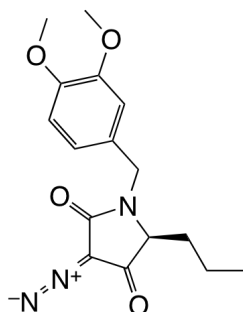

**(S)-3-diazo-1-(3,4-dimethoxybenzyl)-5-propylpyrrolidine-2,4-dione (Star 3c)**  $^1\text{H}$  NMR ( $d_6$  DMSO, 400 MHz)  $\delta$  0.73 (t, 3H,  $J = 8\text{Hz}$ ), 1.09 – 1.14 (m, 2H), 1.65 – 1.70 (m, 2H), 3.70 (s, 3H), 3.71 (s, 3H), 3.83 (t, 1H,  $J = 8\text{Hz}$ ), 4.18 (d, 1H,  $J = 16\text{Hz}$ ), 4.72 (d, 1H,  $J = 16\text{Hz}$ ), 6.81 – 6.89 (m, 3H);  $^{13}\text{C}$  NMR ( $d_6$  DMSO, 400 MHz)  $\delta$  14.34, 14.73, 16.62, 30.85, 44.37, 56.15, 64.26, 65.56, 112.42, 112.51, 121.00, 129.47, 148.96, 149.49, 162.16, 189.97; LCMS: calculated  $[\text{M}+\text{H}]^+ = 318.14$ , found = 318.22.

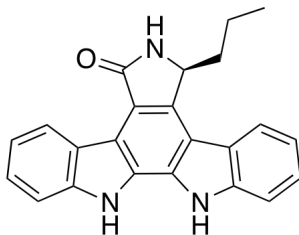

**(S)-7-propyl-6,7,12,13-tetrahydro-5H-indolo[2,3-a]pyrrolo[3,4-c]carbazol-5-one (Star 3)**  $^1\text{H}$  NMR ( $\text{CDCl}_3/\text{MeOH}$ , 400 MHz)  $\delta$  0.89 (t, 3H,  $J = 8\text{Hz}$ ), 1.28-1.32 (m, 1H), 1.50-1.54 (m, 1H), 1.64-1.68 (m, 1H), 3.29 (t, 1H,  $J = 4\text{Hz}$ ), 4.95 (dd, 1H,  $J = 4\text{Hz}$ ,  $J = 4\text{Hz}$ ), 7.21 (t, 1H,  $J = 8\text{Hz}$ ), 7.28 (t, 1H,  $J = 8\text{Hz}$ ), 7.35 (t, 1H,  $J = 8\text{Hz}$ ), 7.43 (t, 2H,  $J = 8\text{Hz}$ ), 7.59 (d, 1H,  $J = 8\text{Hz}$ ), 7.91 (d, 1H,  $J = 8\text{Hz}$ );  $^{13}\text{C}$  NMR ( $\text{CDCl}_3/\text{MeOH}$ , 400 MHz)  $\delta$  13.64, 18.74, 36.03, 57.32, 110.79, 111.57, 114.20, 116.30, 119.34, 120.07, 121.69, 122.77, 123.23, 125.08, 125.35, 125.38, 125.80, 128.88, 138.04, 139.75, 139.93, 174.30; LCMS: calculated  $[\text{M}+\text{H}]^+ = 354.14$ , found = 354.2.

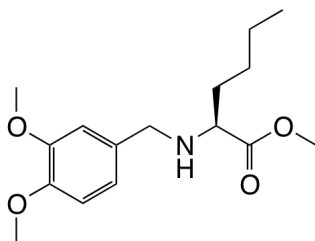

**(S)-methyl 2-((3,4-dimethoxybenzyl)amino)hexanoate (Star 4a)**  $^1\text{H}$  NMR ( $d_6$  DMSO, 400 MHz)  $\delta$  0.81 (t, 3H,  $J = 8\text{Hz}$ ), 1.15 – 1.26 (m, 4H), 1.47 – 1.52 (m, 2H), 2.28 (s, 1H), 3.08 (s, 1H), 3.41 (d, 1H,  $J = 12\text{Hz}$ ), 3.59 (s, 3H), 3.64 (d, 1H,  $J = 12\text{Hz}$ ), 3.69 (s, 3H), 3.70 (s, 3H), 6.75 (dd, 1H,  $J = 4\text{Hz}$ ,  $J = 8\text{Hz}$ ), 6.82 (d, 1H,  $J = 8\text{Hz}$ ), 6.88 (d, 1H,  $J = 4\text{Hz}$ );  $^{13}\text{C}$  NMR ( $d_6$  DMSO, 400 MHz)  $\delta$  14.47, 22.59, 28.27, 33.11, 51.32, 51.92, 55.97, 56.17, 60.38, 112.18, 112.32, 120.50, 133.43, 148.29, 149.27, 176.01; LCMS: calculated  $[\text{M}+\text{H}]^+ = 296.18$ , found = 296.33.

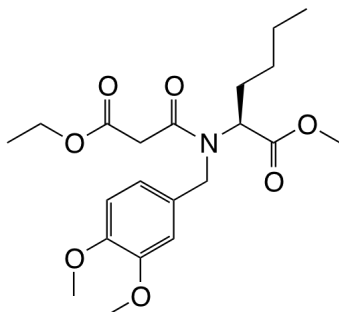

**(S)-methyl 2-(N-(3,4-dimethoxybenzyl)-3-ethoxy-3-oxopropanamido)hexanoate (Star 4b)**  $^1\text{H}$  NMR ( $d_6$  DMSO, 400 MHz)  $\delta$  0.65 – 0.75 (m, 3H), 1.10 – 1.18 (m, 6H), 1.63 – 1.67 (m, 1H), 1.69 – 1.81 (m, 1H), 3.34 (d, 1H,  $J = 12\text{Hz}$ ), 3.50 (s, 3H), 3.54 (d, 1H,  $J = 16\text{Hz}$ ), 3.66 – 3.72 (m 6H), 3.99 – 4.07 (m, 2H), 4.20 – 4.27 (m, 1H), 4.43 – 4.58 (m, 2H), 6.75 – 6.97 (3H);  $^{13}\text{C}$  NMR ( $d_6$  DMSO, 400 MHz)  $\delta$  14.44, 14.60, 22.65, 28.66, 29.19, 52.34, 56.03, 56.19, 59.27, 61.25, 111.77, 112.31, 120.08, 129.80, 131.36, 148.79, 149.41, 167.40, 168.00, 168.13, 171.52; LCMS: calculated  $[\text{M}+\text{H}]^+ = 410.21$ , found = 410.32.

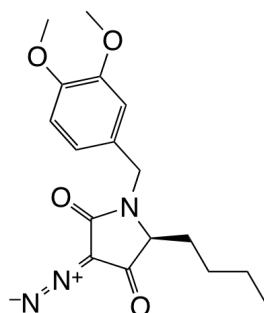

**(S)-5-butyl-3-diazo-1-(3,4-dimethoxybenzyl)pyrrolidine-2,4-dione (Star 4c)**  $^1\text{H}$  NMR ( $d_6$  DMSO, 400 MHz)  $\delta$  0.73 (t, 3H,  $J = 8\text{Hz}$ ), 0.98 – 1.16 (m, 4H), 1.67 – 1.71 (m, 2H), 3.71 (s, 6H), 3.85 (t, 1H,  $J = 4\text{Hz}$ ), 4.21 (d, 1H,  $J = 16\text{Hz}$ ), 4.68 (d, 1H,  $J = 16\text{Hz}$ ), 6.82 (d, 1H,  $J = 8\text{Hz}$ ), 6.87 – 6.89 (m, 1H);  $^{13}\text{C}$  NMR ( $d_6$  DMSO, 400 MHz)  $\delta$  14.34, 14.74, 21.40, 22.61, 25.17, 28.48, 44.47, 56.14, 56.19, 60.41, 64.44, 65.61, 112.44, 112.54, 121.04, 129.55, 148.97, 149.48, 162.21, 189.98; LCMS: calculated  $[\text{M}+\text{H}]^+ = 332.15$ , found = 332.26.

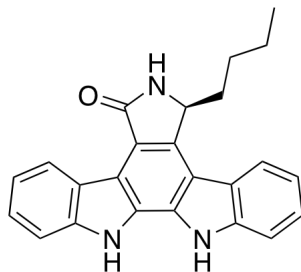

**(S)-7-butyl-6,7,12,13-tetrahydro-5H-indolo[2,3-a]pyrrolo[3,4-c]carbazol-5-one (Star 4)**  $^1\text{H}$  NMR ( $\text{CDCl}_3/\text{MeOH}$ , 400 MHz)  $\delta$  0.73 (t, 3H,  $J = 8\text{Hz}$ ), 1.07-1.29 (m, 5H), 1.39-1.46 (m, 1H), 2.18 (m, 1H), 4.28 (d, 1H,  $J = 8\text{Hz}$ ), 7.16 (t, 2H,  $J = 8\text{Hz}$ ), 7.22-7.26 (m, 2H), 7.38 (t, 1H,  $J = 8\text{Hz}$ ), 7.50 (d, 1H,  $J = 8\text{Hz}$ ), 7.72 (d, 1H, 8Hz), 9.02 (d, 1H,  $J = 8\text{Hz}$ );  $^{13}\text{C}$  NMR ( $\text{CDCl}_3/\text{MeOH}$ , 400 MHz)  $\delta$  13.92, 22.56, 22.66, 33.47, 57.40, 110.93, 111.59, 115.97, 119.43, 120.06, 121.79, 122.71, 122.89, 125.03, 125.07, 125.38, 125.49, 128.69, 137.92, 139.37, 139.62, 174.25; LCMS: calculated  $[\text{M}+\text{H}]^+ = 368.17$ , found = 368.24.

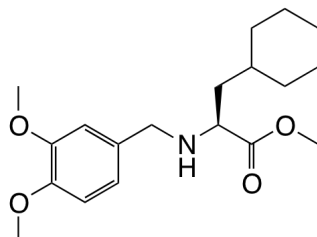

**(S)-methyl 3-cyclohexyl-2-((3,4-dimethoxybenzyl)amino)propanoate (Star 5a)**  $^1\text{H}$  NMR ( $d_6\text{DMSO}$ , 400 MHz)  $\delta$  0.68 – 0.87 (m, 2H), 1.03 – 1.23 (m, 3H), 1.32 – 1.60 (m, 8H), 2.27 (s, 1H), 3.40 (d, 1H,  $J = 12\text{Hz}$ ), 3.59 (s, 3H), 3.65 (d, 1H,  $J = 16\text{Hz}$ ), 3.69 (s, 3H), 3.70 (s, 3H), 6.73 (d, 1H,  $J = 8\text{Hz}$ ), 6.81 (d, 1H,  $J = 12\text{Hz}$ ), 6.88 (s, 1H);  $^{13}\text{C}$  NMR ( $d_6\text{DMSO}$ , 400 MHz)  $\delta$  26.32, 26.48, 26.70, 32.80, 33.79, 34.31, 51.28, 51.92, 55.93, 56.17, 57.99, 112.10, 112.26, 120.56, 133.42, 148.31, 149.28, 176.40; LCMS: calculated  $[\text{M}+\text{H}]^+ = 336.21$ , found = 336.69.

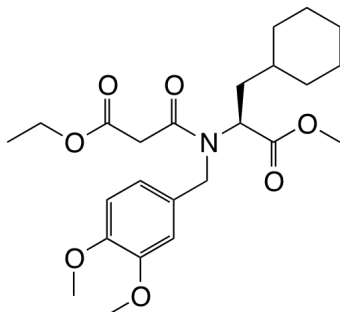

**(S)-ethyl 3-((3-cyclohexyl-1-methoxy-1-oxopropan-2-yl)(3,4-dimethoxybenzyl)amino)-3-oxopropanoate (Star 5b)**  $^1\text{H}$  NMR ( $\text{d}_6$  DMSO, 400 MHz)  $\delta$  0.66 – 0.74 (m, 2H), 0.94 – 1.11 (m, 4H), 1.11 – 1.17 (m, 3H), 1.35 (d, 1H,  $J = 12.8\text{Hz}$ ), 1.43 – 1.64 (m, 5H), 1.70 – 1.77 (m, 1H), 3.43 – 3.56 (m, 1H), 3.50 (s, 3H), 3.71 (s, 3H), 3.72 (s, 3H), 4.02 – 4.11 (m, 2H), 4.39 – 4.70 (m, 2H), 6.73 – 6.94 (m, 3H);  $^{13}\text{C}$  NMR ( $\text{d}_6$  DMSO, 400 MHz)  $\delta$  26.23, 26.42, 32.99, 33.55, 34.38, 37.05, 41.79, 51.35, 52.43, 55.61, 56.03, 56.23, 56.31, 61.25, 111.85, 112.36, 120.16, 129.79, 148.86, 149.45, 167.59, 168.02, 171.84; LCMS: calculated  $[\text{M}+\text{H}]^+ = 450.24$ , found = 450.33.

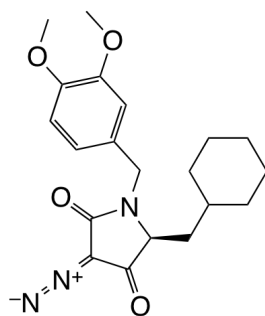

**(S)-5-(cyclohexylmethyl)-3-diazo-1-(3,4-dimethoxybenzyl)pyrrolidine-2,4-dione (Star 5c)**  $^1\text{H}$  NMR ( $\text{CDCl}_3$ , 400 MHz)  $\delta$  0.67 – 0.77 (m, 2H), 0.81 – 0.88 (m, 3H), 1.33 – 1.66 (m, 8H), 3.63 (t, 1H,  $J = 8\text{Hz}$ ), 3.75 (s, 6H), 3.83 (d, 1H,  $J = 16\text{Hz}$ ), 5.03 (d, 1H,  $J = 16\text{Hz}$ ), 6.66 – 6.72 (m, 3H);  $^{13}\text{C}$  NMR ( $\text{CDCl}_3$ , 400 MHz)  $\delta$  26.10, 26.23, 26.31, 33.44, 33.46, 36.80, 44.50, 56.05, 56.08, 61.86, 65.23, 111.34, 111.52, 120.85, 128.24, 149.06, 149.56, 161.92, 189.65; LCMS: calculated  $[\text{M}+\text{H}]^+ = 372.18$ , found = 372.26.

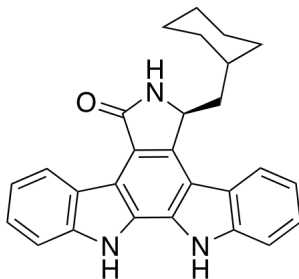

**(S)-7-(cyclohexylmethyl)-6,7,12,13-tetrahydro-5H-indolo[2,3-a]pyrrolo[3,4-c]carbazol-5-one (Star 5)**  $^1\text{H}$  NMR ( $\text{CDCl}_3/\text{MeOD}$ , 400 MHz)  $\delta$  0.76-0.84 (m, 1H), 0.98-1.29 (m, 6H), 1.35-1.41 (m, 2H), 1.52-1.60 (m, 2H), 1.73-1.77 (d, 1H,  $J = 16\text{Hz}$ ), 1.96-2.05 (m, 1H), 2.08-2.22 (m, 1H), 4.37-4.69 (m, 1H), 7.10-7.17 (m, 2H), 7.19-7.22 (m, 1H), 7.25-7.36 (m, 2H), 7.42-7.47 (m, 1H), 7.69-7.76 (m, 1H), 7.82 (s, 1H), 9.00-9.07 (m, 1H);  $^{13}\text{C}$  NMR ( $\text{CDCl}_3/\text{MeOD}$ , 400 MHz)  $\delta$  31.52, 34.49, 35.98, 36.72, 42.32, 55.01, 59.51, 87.93, 110.90, 111.53, 113.76, 119.33, 120.05, 121.84, 122.63, 122.98, 124.92, 125.17, 125.29, 125.45, 138.65, 139.39, 139.61, 163.24; LCMS: calculated  $[\text{M}+\text{H}]^+ = 408.20$ , found = 408.3.

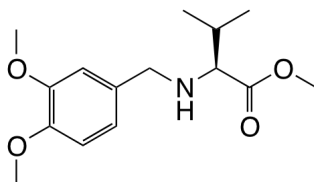

**(S)-methyl 2-((3,4-dimethoxybenzyl)amino)-3-methylbutanoate (Star 6a)**  $^1\text{H}$  NMR ( $d_6$  DMSO, 400 MHz)  $\delta$  0.83 (d, 3H,  $J = 8\text{Hz}$ ), 0.88 (d, 3H,  $J = 8\text{Hz}$ ), 1.80 (sep, 1H,  $J = 8\text{Hz}$ ), 2.21 (s, 1H), 2.85 (d, 1H,  $J = 8\text{Hz}$ ), 3.40 (d, 1H,  $J = 16\text{Hz}$ ), 3.61 (s, 3H), 3.69 (d, 1H,  $J = 16\text{Hz}$ ), 3.70 (s, 3H), 3.72 (s, 3H), 6.75 (d, 1H,  $J = 8\text{Hz}$ ), 6.82 (d, 1H,  $J = 4\text{Hz}$ ), 6.90 (s, 1H);  $^{13}\text{C}$  NMR ( $d_6$  DMSO, 400 MHz)  $\delta$  19.34, 19.87, 31.66, 51.67, 51.73, 55.92, 55.97, 56.12, 66.36, 112.15, 112.18, 112.25, 120.49, 133.40, 148.33, 149.29, 175.65; LCMS: calculated  $[\text{M}+\text{H}]^+ = 282.16$ , found = 282.31.

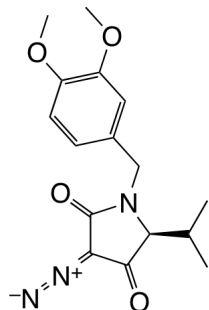

**(S)-3-diazo-1-(3,4-dimethoxybenzyl)-5-isopropylpyrrolidine-2,4-dione (Star 6c)**  $^1\text{H}$  NMR ( $\text{CDCl}_3$ , 400 MHz)  $\delta$  0.89 (d, 3H,  $J = 8\text{Hz}$ ), 1.06 (d, 3H,  $J = 8\text{Hz}$ ), 2.19 – 2.26 (m, 1H), 3.59 (d, 1H,  $J = 4\text{Hz}$ ), 3.84 (s, 3H), 3.85 (d, 3H), 3.94 (d, 1H,  $J = 16\text{Hz}$ ), 5.14 (d, 1H, 16Hz), 6.73 – 6.80 (m, 3H);  $^{13}\text{C}$  NMR ( $\text{CDCl}_3$ , 400 MHz)  $\delta$  0.19, 16.14, 18.08, 28.92, 44.55, 56.12, 56.19, 68.02, 111.36, 111.50, 120.85, 128.19, 149.10, 149.65, 162.41, 189.06; LCMS: calculated  $[\text{M}+\text{H}]^+ = 318.14$ , found = 318.26.

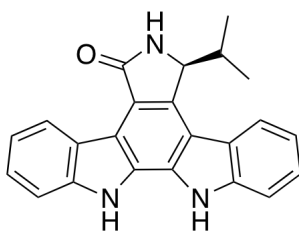

**(S)-7-isopropyl-6,7,12,13-tetrahydro-5H-indolo[2,3-a]pyrrolo[3,4-c]carbazol-5-one (Star 6)**  $^1\text{H}$  NMR ( $d_6$  DMSO, 400 MHz)  $\delta$  0.24 (d, 3H,  $J = 8\text{Hz}$ ), 1.33 (d, 3H,  $J = 8\text{Hz}$ ), 2.76-2.83 (m, 1H), 5.19 (s, 1H), 7.20 (t, 1H,  $J = 8\text{Hz}$ ), 7.28 (t, 1H,  $J = 8\text{Hz}$ ), 7.42 (quin,  $J = 8\text{Hz}$ ), 7.69 (d, 1H,  $J = 8\text{Hz}$ ), 7.76 (d, 1H,  $J = 8\text{Hz}$ ), 8.04 (d, 1H,  $J = 8\text{Hz}$ ), 8.54 (s, 1H), 9.20 (d, 1H,  $J = 8\text{Hz}$ ), 11.28 (s, 1H), 11.54 (s, 1H);  $^{13}\text{C}$  NMR (DMSO, 400 MHz)  $\delta$  14.32, 21.83, 30.41, 62.00, 112.00, 112.71, 114.25, 115.97, 119.59, 119.80, 120.53, 122.40, 122.83, 123.42, 125.54, 125.74, 126.00, 126.17, 128.85, 137.04, 139.87, 140.08, 173.13; LCMS: calculated  $[\text{M}+\text{H}]^+ = 354.42$ , found = 354.3.

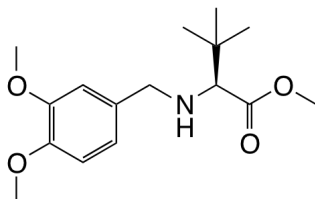

**(S)-methyl 2-((3,4-dimethoxybenzyl)amino)-3,3-dimethylbutanoate (Star 7a)**  $^1\text{H}$  NMR ( $\text{CDCl}_3$ , 400 MHz)  $\delta$  0.93 (s, 9H), 1.82 (br, 1H), 2.87 (s, 1H), 3.45 (d, 1H,  $J = 12\text{Hz}$ ), 3.68 (s, 3H), 3.74 (d, 1H,  $J = 12\text{Hz}$ ), 3.84 (s, 3H), 3.85 (s, 3H), 6.77 (d, 1H,  $J = 8\text{Hz}$ ), 6.80 (dd, 1H,  $J = 8\text{Hz}$ ,  $J = 4\text{Hz}$ ), 6.91 (d, 1H,  $J = 4\text{Hz}$ );  $^{13}\text{C}$  NMR ( $\text{CDCl}_3$ , 400 MHz)  $\delta$  26.94, 34.21, 51.22, 52.61, 55.96, 56.09, 69.55, 111.02, 111.60, 120.52, 132.89, 148.19, 149.04, 175.90; LCMS: calculated  $[\text{M}+\text{H}]^+ = 296.18$ , found = 296.30.

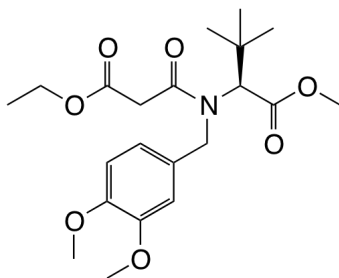

**(S)-methyl 2-(N-(3,4-dimethoxybenzyl)-3-ethoxy-3-oxopropanamido)-3,3-dimethylbutanoate (Star 7b)**  $^1\text{H}$  NMR ( $\text{CDCl}_3$ , 400 MHz)  $\delta$  1.07 (s, 9H), 1.22 (t, 3H,  $J$  = 8Hz), 3.22 (d, 1H,  $J$  = 16Hz), 3.40 (d, 1H,  $J$  = 16Hz), 3.45 (s, 3H), 3.82 (s, 6H), 4.10 – 4.16 (m, 2H), 4.56 (d, 1H,  $J$  = 16Hz), 4.97 (d, 1H,  $J$  = 16Hz), 5.12 (br, 1H), 6.60 – 6.64 (m, 2H), 6.78 (d, 1H,  $J$  = 12Hz);  $^{13}\text{C}$  NMR ( $\text{CDCl}_3$ , 400 MHz)  $\delta$  14.29, 27.63, 37.06, 42.21, 50.61, 51.64, 56.01, 56.12, 61.62, 63.37, 108.95, 111.50, 117.64, 129.93, 148.37, 149.53, 167.68, 168.65, 170.16; LCMS: calculated  $[\text{M}+\text{H}]^+ = 410.21$ , found = 410.29.

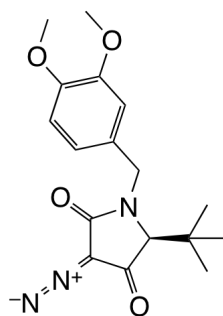

**(S)-5-(tert-butyl)-3-diazo-1-(3,4-dimethoxybenzyl)pyrrolidine-2,4-dione (Star 7c)**  $^1\text{H}$  NMR ( $\text{CDCl}_3$ , 400 MHz)  $\delta$  1.05 (s, 9H), 3.38 (s, 1H), 3.81 (s, 3H), 3.83 (s, 3H), 4.08 (d, 1H,  $J$  = 16Hz), 5.34 (d, 1H,  $J$  = 16Hz), 6.67 (s, 1H), 6.69 (d, 1H,  $J$  = 4Hz), 6.78 (d, 1H,  $J$  = 8Hz);  $^{13}\text{C}$  NMR ( $\text{CDCl}_3$ , 400 MHz)  $\delta$  27.09, 37.29, 48.46, 56.11, 56.18, 71.70, 77.27, 111.46, 111.47, 120.85, 128.45, 149.03, 149.63, 164.74, 189.54; LCMS: calculated  $[\text{M}+\text{H}]^+ = 332.15$ , found = 332.20.



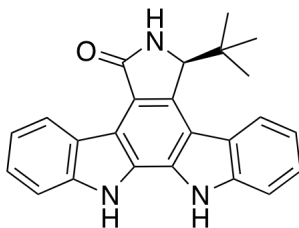

**(S)-7-(tert-butyl)-6,7,12,13-tetrahydro-5H-indolo[2,3-a]pyrrolo[3,4-c]carbazol-5-one (Star 7)** <sup>1</sup>H NMR (d<sub>6</sub> DMSO, 400 MHz) δ 0.90 (s, 9H), 5.11 (s, 1H), 7.18-7.22 (m, 2H), 7.37-7.40 (m, 2H), 7.69 (t, 2H, *J* = 8Hz), 8.30 (d, 1H, *J* = 8Hz), 8.46 (s, 1H), 9.22 (d, 1H, *J* = 8Hz), 11.27 (s, 1H), 11.50 (s, 1H); <sup>13</sup>C NMR (DMSO, 400 MHz) δ 27.64, 39.55, 65.65, 111.96, 112.35, 116.05, 116.18, 119.59, 119.65, 120.88, 123.40, 123.81, 123.95, 125.43, 125.82, 126.22, 126.56, 128.90, 135.79, 140.03, 140.09, 172.93; LCMS: calculated [M+H]<sup>+</sup> = 368.17, found = 368.3.

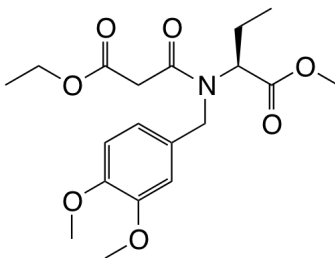

**(S)-methyl 2-(N-(3,4-dimethoxybenzyl)-3-ethoxy-3-oxopropanamido)butanoate (Star 8b)** <sup>1</sup>H NMR (CDCl<sub>3</sub>, 400 MHz) δ 0.80 (t, 3H, *J* = 6Hz), 1.21 (t, 3H, *J* = 4Hz), 1.77 – 1.82 (m, 1H), 1.95 – 2.00 (m, 1H), 3.39 (d, 1H, *J* = 8Hz), 3.58 (s, 3H), 3.79 – 3.86 (m, 6H), 4.10 – 4.16 (m, 2H), 4.41 – 4.59 (m, 3H), 6.70 – 6.86 (m, 3H); <sup>13</sup>C NMR (CDCl<sub>3</sub>, 400 MHz) δ 10.93, 11.31, 14.22, 41.78, 42.20, 46.39, 51.03, 52.20, 52.45, 56.03, 61.66, 61.78, 62.24, 110.03, 110.86, 111.42, 111.74, 119.05, 120.50, 128.85, 148.74, 149.53, 167.58, 171.41; LCMS: [M+H]<sup>+</sup> = 382.18, found = 382.18.

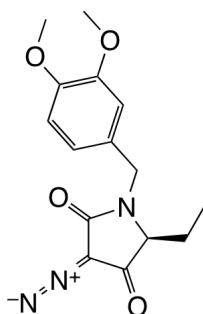

**(S)-3-diazo-1-(3,4-dimethoxybenzyl)-5-ethylpyrrolidine-2,4-dione (Star 8c)** <sup>1</sup>H NMR (d<sub>6</sub> DMSO, 400 MHz) δ 0.66 (t, 3H, *J* = 8Hz), 1.72 – 1.78 (m, 2H), 3.70 (s, 6H), 3.83 (t, 1H, *J* = 4Hz), 4.14 (d, 1H, *J* = 16Hz), 4.75 (d, 1H, *J* = 16Hz), 6.81 – 6.89 (m, 3H); <sup>13</sup>C NMR (DMSO, 400 MHz) δ 1.81, 7.68, 21.75, 44.25, 56.16, 64.86, 112.42, 112.50, 120.98, 129.40, 148.93, 149.47, 162.30, 189.92; LCMS: [M+H]<sup>+</sup> = 304.12, found = 304.30.

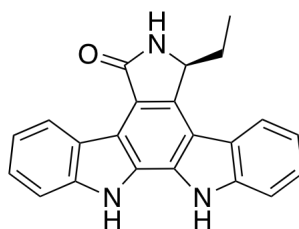

**(S)-7-ethyl-6,7,12,13-tetrahydro-5H-indolo[2,3-*a*]pyrrolo[3,4-*c*]carbazol-5-one (Star 8)**  $^1\text{H}$  NMR ( $d_6$  DMSO, 400 MHz)  $\delta$  0.83 (t, 3H,  $J = 8\text{Hz}$ ), 1.74 (m, 1H), 2.31-2.36 (m, 1H), 5.20 (d, 1H,  $J = 8\text{Hz}$ ), 7.20 (t, 1H,  $J = 8\text{Hz}$ ), 7.28 (t, 1H,  $J = 8\text{Hz}$ ), 7.38-7.46 (m, 2H), 7.68 (d, 1H,  $J = 8\text{Hz}$ ), 7.75 (d, 1H,  $J = 8\text{Hz}$ ), 8.08 (d, 1H,  $J = 8\text{Hz}$ ), 9.21 (d, 1H,  $J = 8\text{Hz}$ ), 11.36 (s, 1H), 11.62 (s, 1H);  $^{13}\text{C}$  NMR (DMSO, 400 MHz)  $\delta$  9.89, 27.23, 57.91, 111.97, 112.67, 114.35, 116.08, 119.58, 119.62, 120.55, 122.33, 122.81, 123.45, 125.57, 125.98, 126.21, 128.80, 137.32, 139.88, 140.07, 172.51; LCMS:  $[\text{M}+\text{H}]^+ = 340.14$ , found = 340.18.

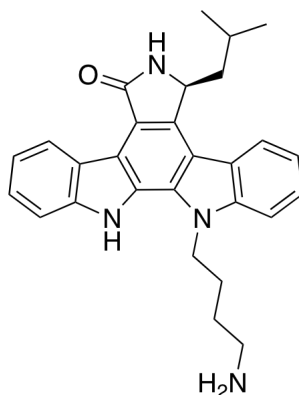

**(S)-12-(4-aminobutyl)-7-isobutyl-6,7,12,13-tetrahydro-5H-indolo[2,3-*a*]pyrrolo[3,4-*c*]carbazol-5-one (Star 12)**  $^1\text{H}$  NMR ( $d_6$  DMSO, 400 MHz)  $\delta$  0.81 (d, 3H,  $J = 8\text{ Hz}$ ), 1.21 (d, 3H,  $J = 4\text{ Hz}$ ), 1.32 (s, 1H), 1.49 – 1.62 (m, 2H), 1.84 – 1.90 (m, 2H), 2.03 – 2.08 (m, 1H), 2.21 (t, 1H,  $J = 12\text{ Hz}$ ), 2.66 – 2.75 (m, 2H), 3.67 (s, 1H), 4.95 (b, 2H), 5.25 (d, 1H,  $J = 8\text{ Hz}$ ), 7.21 (t, 1H,  $J = 8\text{ Hz}$ ), 7.34 (t, 1H,  $J = 8\text{ Hz}$ ), 7.42 (t, 1H,  $J = 8\text{ Hz}$ ), 7.51 (t, 1H,  $J = 8\text{ Hz}$ ), 7.70 (d, 1H,  $J = 4\text{ Hz}$ ), 7.82 (d, 1H,  $J = 8\text{ Hz}$ ), 8.03 (d, 1H,  $J = 8\text{ Hz}$ ), .40 (s, 1H), 8.79 (s, 1H), 9.32 (d, 1H,  $J = 4\text{ Hz}$ );  $^{13}\text{C}$  NMR ( $d_6$  DMSO, 400 MHz)  $\delta$  22.30, 24.67, 25.60, 25.87, 28.13, 44.19, 44.79, 55.24, 110.90, 112.13, 114.30, 117.67, 119.18, 119.63, 120.62, 122.24, 122.31, 122.85, 125.50, 125.62, 125.85, 126.01, 129.40, 138.45, 140.80, 172.16; LCMS: calculated  $[\text{M}+\text{H}]^+ = 439.24$ , found = 439.32.

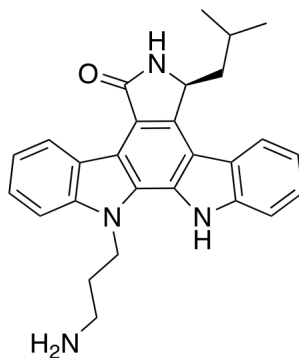

**(S)-13-(3-aminopropyl)-7-isobutyl-6,7,12,13-tetrahydro-5H-indolo[2,3-a]pyrrolo[3,4-c]carbazol-5-one (Star 16)**  $^1\text{H}$  NMR ( $d_6$ DMSO, 400 MHz)  $\delta$  0.81 (d, 3H,  $J = 4\text{Hz}$ ), 1.21 (d, 3H,  $J = 4\text{Hz}$ ), 2.00 – 2.11 (m, 2H), 2.19 – 2.25 (m, 2H), 2.75 (t, 2H,  $J = 6\text{Hz}$ ), 4.94 (t, 2H,  $J = 6\text{Hz}$ ), 5.26 (d, 1H,  $J = 8\text{Hz}$ ), 7.24 (t, 1H,  $J = 8\text{Hz}$ ), 7.32 (t, 1H,  $J = 8\text{Hz}$ ), 7.45 (t, 2H,  $J = 8\text{Hz}$ ), 7.75 (t, 2H,  $J = 8\text{Hz}$ ), 8.03 (d, 1H,  $J = 8\text{Hz}$ ), 8.80 (s, 1H), 9.36 (d, 1H,  $J = 8\text{Hz}$ );  $^{13}\text{C}$  NMR ( $d_6$ DMSO, 400 MHz)  $\delta$  22.32, 24.69, 25.86, 30.81, 37.42, 44.74, 55.28, 61.56, 94.62, 109.86, 112.91, 115.49, 116.52, 119.13, 119.76, 120.61, 122.09, 122.18, 123.02, 125.66, 125.93, 126.36, 127.15, 128.34, 138.65, 140.69, 141.11, 172.13; LCMS: calculated  $[\text{M}+\text{H}]^+ = 425.23$ , found = 425.34.

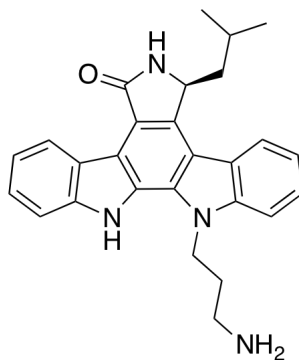

**(S)-12-(3-aminopropyl)-7-isobutyl-6,7,12,13-tetrahydro-5H-indolo[2,3-a]pyrrolo[3,4-c]carbazol-5-one (Star 17)**  $^1\text{H}$  NMR ( $d_6$  DMSO, 400 MHz)  $\delta$  0.80 (d, 3H,  $J = 4\text{Hz}$ ), 1.21 (d, 3H,  $J = 4\text{Hz}$ ), 1.99 – 2.05 (m, 1H), 2.10 – 2.13 (m, 2H), 2.18 – 2.24 (m, 1H), 2.76 (t, 2H,  $J = 6\text{Hz}$ ), 4.97 (t, 2H,  $J = 6\text{Hz}$ ), 5.26 (d, 1H,  $J = 8\text{Hz}$ ), 7.21 (t, 1H,  $J = 8\text{Hz}$ ), 7.35 (t, 1H,  $J = 8\text{Hz}$ ), 7.42 (t, 1H,  $J = 8\text{Hz}$ ), 7.52 (t, 1H,  $J = 8\text{Hz}$ ), 7.68 (d, 1H,  $J = 8\text{Hz}$ ), 7.84 (d, 1H,  $J = 8\text{Hz}$ ), 8.04 (d, 1H,  $J = 8\text{Hz}$ ), 8.80 (s, 1H), 9.32 (d, 1H,  $J = 8\text{Hz}$ );  $^{13}\text{C}$  NMR ( $d_6$ DMSO, 400 MHz)  $\delta$  22.32, 24.67, 25.85, 30.82, 37.46, 42.01, 44.77, 55.26, 110.75, 112.08, 114.27, 117.73, 119.27, 119.65, 120.75, 122.27, 122.36, 122.96, 125.71, 125.75, 125.88, 126.06, 129.61, 138.45, 140.86, 140.91, 172.15; LCMS: calculated  $[\text{M}+\text{H}]^+ = 425.23$ , found = 425.36

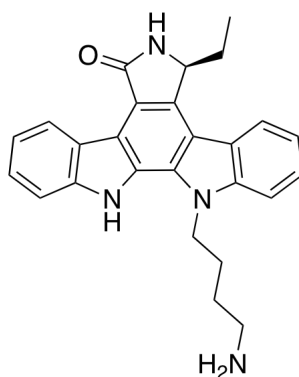

**(S)-12-(4-aminobutyl)-7-ethyl-6,7,12,13-tetrahydro-5H-indolo[2,3-a]pyrrolo[3,4-c]carbazol-5-one (Star 18)**  $^1\text{H}$  NMR ( $d_6$  DMSO, 400 MHz)  $\delta$  0.84 (t, 3H,  $J$  = 6.8 Hz), 1.53 – 1.58 (m, 2H), 1.65 – 1.70 (m, 1H), 1.91 (t, 2H,  $J$  = 7.2Hz), 2.34 – 2.40 (m, 1H), 2.70 (t, 2H,  $J$  = 6.8Hz), 3.69 – 3.72 (m, 1H), 7.21 (t, 1H,  $J$  = 8Hz), 7.30 (t, 1H,  $J$  = 8Hz), 7.40 (t, 1H,  $J$  = 7.6Hz), 7.51 (t, 1H,  $J$  = 7.6Hz), 7.71 (d, 1H,  $J$  = 8.4Hz), 7.81 (d, 1H,  $J$  = 8.4Hz), 8.09 (d, 1H,  $J$  = 8.4), 8.65 (s, 1H), 9.32 (d, 1H,  $J$  = 8Hz);  $^{13}\text{C}$  NMR ( $d_6$ DMSO, 400 MHz)  $\delta$  10.03, 25.67, 27.27, 28.12, 44.18, 57.78, 108.33, 110.66, 110.69, 110.75, 110.80, 112.12, 114.43, 114.47, 117.50, 119.68, 122.35, 125.54, 129.37, 137.36, 140.77, 140.79, 155.45, 165.90, 169.63, 172.33; LCMS: calculated  $[\text{M}+\text{H}]^+ = 411.21$  , found = 411.32.

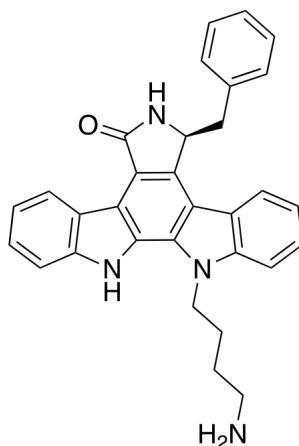

**(S)-12-(4-aminobutyl)-7-benzyl-6,7,12,13-tetrahydro-5H-indolo[2,3-a]pyrrolo[3,4-c]carbazol-5-one (Star 19)**  $^1\text{H}$  NMR ( $d_6$  DMSO, 400 MHz)  $\delta$  1.53 – 1.59 (m, 2H), 1.90 – 1.94 (m, 2H), 2.70 – 2.73 (m, 2H), 3.20 – 3.24 (m, 2H), 3.56 – 3.59 (m, 2H), 4.93 – 4.98 (m, 2H), 5.58 (s 1H), 6.90 (d, 2H,  $J$  = 8Hz), 6.98 – 7.01 (m, 3H), 7.14 (t, 1H,  $J$  = 8Hz), 7.36 – 7.40 (m, 2H), 7.55 (t, 1H,  $J$  = 8Hz), 7.68 (d, 1H,  $J$  = 8Hz), 7.86 (d, 1H,  $J$  = 8Hz), 8.32 (d, 1H,  $J$  = 8Hz), 8.49 (s, 1H), 9.18 (d, 1H,  $J$  = 8Hz);  $^{13}\text{C}$  NMR ( $d_6$ DMSO, 400 MHz)  $\delta$  26.14, 28.00, 31.36, 39.25, 44.21, 57.18, 82.56, 94.61, 110.88, 112.11, 114.66, 117.39, 119.51, 120.06, 120.77, 122.38, 122.56, 122.75, 125.51, 125.72, 125.98, 126.81, 128.31, 129.29, 130.14, 136.53, 137.13, 140.76, 140.83, 166.36, 172.00; LCMS: calculated  $[\text{M}+\text{H}]^+ = 473.23$ , found = 473.30.

## References

1. Levinson, N. M., Seeliger, M. A., Cole, P. A. & Kuriyan, J. Structural basis for the recognition of c-Src by its inactivator Csk. *Cell* **134**, 124–134 (2008).
2. Wood, J. L., Petsch, D. T., Stoltz, B. M. & Hawkins, E. M. Total synthesis and protein kinase activity of C (7) methyl derivatives of K252a. *Synthesis* **SI**, 1529–1533 (1999).
3. Kleinschroth, J., Hartenstein, J. & Rudolph, C. Non-glycosidic/non-aminoalkyl-substituted indolocarbazoles as inhibitors of protein kinase C. *Bioorg Med Chem Lett* **3**, 1959–1964 (1993).
4. Seeliger, M. A. *et al.* High yield bacterial expression of active c-Abl and c-Src tyrosine kinases. *Protein Sci.* **14**, 3135–3139 (2005).
5. Bishop, A. C., Shah, K., Liu, Y., Witucki, L. & Kung, C. Design of allele-specific inhibitors to probe protein kinase signaling. *Curr Biol* **8**, 257–266 (1998).
6. Dalva, M. B. *et al.* EphB receptors interact with NMDA receptors and regulate excitatory synapse formation. *Cell* **103**, 945–956 (2000).
7. Zhang, C. *et al.* Structure-guided Inhibitor Design Expands the Scope of Analog-Sensitive Kinase Technology. *ACS Chem. Biol.* **8**, 1931–1938 (2013).
8. Li, M. Z. & Elledge, S. J. Harnessing homologous recombination in vitro to generate recombinant DNA via SLIC. *Nat. Methods* **4**, 251–256 (2007).
9. Breitenlechner, C. B. *et al.* Crystal structures of active SRC kinase domain complexes. *J. Mol. Biol.* **353**, 222–231 (2005).
10. McCoy, A. J., Grosse-Kunstleve, R. W. & Adams, P. D. Phaser crystallographic software. *J. Appl. Cryst.* **40**, 658–674 (2007).
11. Emsley, P., Lohkamp, B. & Scott, W. G. Features and development of Coot. *Acta Cryst.* **D66**, 486–501 (2010).
12. Adams, P. D. *et al.* PHENIX: a comprehensive Python-based system for macromolecular structure solution. *Acta Cryst.* **D66**, 213–221 (2010).
